RESEARCH ARTICLE

# The burden, prevention and care of infants and children with congenital anomalies in sub-Saharan Africa: A scoping review

Aminkeng Zawuo Leke<sup>1,2</sup>\*, Helen Malherbe<sup>3</sup>, Emma Kalk<sup>4</sup>, Ushma Mehta<sup>4</sup>, Phylis Kisa<sup>5</sup>, Lorenzo D. Botto<sup>6,7</sup>, Idowu Ayede<sup>8</sup>, Lee Fairlie<sup>9</sup>, Nkwati Michel Maboh<sup>10</sup>, Ieda Orioli<sup>10,11</sup>, Rebecca Zash<sup>12</sup>, Ronald Kusolo<sup>13</sup>, Daniel Mumpemwanja<sup>13</sup>, Robert Serujogi<sup>13</sup>, Bodo Bongomin<sup>14</sup>, Caroline Osoro<sup>15</sup>, Clarisse Dah<sup>16</sup>, Olive Sentumbwe–Mugisha<sup>17</sup>, Hamisi Kimaro Shabani<sup>18</sup>, Philippa Musoke<sup>13</sup>, Helen Dolk<sup>1</sup>, Linda Barlow-Mosha<sup>13</sup>

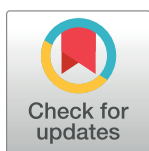

**1** Institute for Nursing and Health Research, Centre for Maternal, Fetal and Infant Research, Ulster University, Newtownabbey, United Kingdom, **2** Centre for Infant and Maternal Health Research, Health Research Foundation, Buea, Cameroon, **3** Research & Epidemiology, Rare Diseases South Africa NPC, Bryanston, Sandton, South Africa, **4** Centre for Infectious Disease Epidemiology & Research, School of Public Health, University of Cape Town, Cape Town, South Africa, **5** Makerere University College of Health Sciences, Kampala, Uganda, **6** Division of Medical Genetics, University of Utah, Salt Lake City, Utah, United States of America, **7** International Center on Birth Defects, University of Utah, Salt Lake City, Utah, United States of America, **8** Department of Paediatrics, College of Medicine, University of Ibadan and University College Hospital, Ibadan, Nigeria, **9** Faculty of Health Sciences, Wits Reproductive Health and HIV Institute, University of the Witwatersrand, Johannesburg, South Africa, **10** Genetics Department, Federal University of Rio de Janeiro, Rio de Janeiro, Brazil, **11** ReLAMC: Latin American Network for Congenital Malformation Surveillance, Federal University of Rio de Janeiro, Rio de Janeiro, Brazil, **12** The Botswana Harvard AIDS Institute Partnership, Gaborone, Botswana and Beth Israel Deaconess Medical Center, Boston, Massachusetts, United States of America, **13** Makerere University-Johns Hopkins University Research Collaboration, Kampala, Uganda, **14** Gulu University Faculty of Medicine: Gulu, Gulu, UG/ World Health Organization, Kampala, Uganda, **15** Kenya Medical Research Institute, Centre for Global Health Research, Nairobi, Kenya, **16** Centre de Recherche en Santé de Nouna, Nouna, Burkina Faso, **17** World Health Organization, Kampala, Uganda, **18** Neurosurgery Department, Muhimbili Orthopaedic Institute, Dar es salaam, Tanzania

**OPEN ACCESS**

**Citation:** Leke AZ, Malherbe H, Kalk E, Mehta U, Kisa P, Botto LD, et al. (2023) The burden, prevention and care of infants and children with congenital anomalies in sub-Saharan Africa: A scoping review. *PLOS Glob Public Health* 3(6): e0001850. <https://doi.org/10.1371/journal.pgph.0001850>

**Editor:** Julia Robinson, PLOS: Public Library of Science, UNITED STATES

**Received:** October 24, 2022

**Accepted:** March 17, 2023

**Published:** June 28, 2023

**Copyright:** © 2023 Leke et al. This is an open access article distributed under the terms of the [Creative Commons Attribution License](https://creativecommons.org/licenses/by/4.0/), which permits unrestricted use, distribution, and reproduction in any medium, provided the original author and source are credited.

**Data Availability Statement:** All data are within the manuscript and its [Supporting Information](#) files.

**Funding:** This project was funded by UK Research and Innovation and Medical Research Council (grant number MR/T039132/1). AZL, HD and LBM received salary from this grant. The funders had no role in study design, data collection and analysis, decision to publish, or preparation of the manuscript.

\* These authors contributed equally to this work.  
\* [az.leke@ulster.ac.uk](mailto:az.leke@ulster.ac.uk), [leke@hrfbuea.org](mailto:leke@hrfbuea.org)

## Abstract

The aim of this scoping review was to determine the scope, objectives and methodology of contemporary published research on congenital anomalies (CAs) in sub-Saharan Africa (SSA), to inform activities of the newly established sub-Saharan African Congenital Anomaly Network (sSCAN). MEDLINE was searched for CA-related articles published between January 2016 and June 2021. Articles were classified into four main areas (public health burden, surveillance, prevention, care) and their objectives and methodologies summarized. Of the 532 articles identified, 255 were included. The articles originated from 22 of the 49 SSA countries, with four countries contributing 60% of the articles: Nigeria (22.0%), Ethiopia (14.1%), Uganda (11.7%) and South Africa (11.7%). Only 5.5% of studies involved multiple countries within the region. Most articles included CA as their primary focus (85%), investigated a single CA (88%), focused on CA burden (56.9%) and care (54.1%), with less coverage of surveillance (3.5%) and prevention (13.3%). The most common study designs were case studies/case series (26.6%), followed by cross-sectional surveys (17.6%),

**Competing interests:** The authors have declared that no competing interests exist.

retrospective record reviews (17.3%), and cohort studies (17.2%). Studies were mainly derived from single hospitals (60.4%), with only 9% being population-based studies. Most data were obtained from retrospective review of clinical records (56.1%) or via caregiver interviews (34.9%). Few papers included stillbirths (7.5%), prenatally diagnosed CAs (3.5%) or terminations of pregnancy for CA (2.4%). This first-of-a-kind-scoping review on CA in SSA demonstrated an increasing level of awareness and recognition among researchers in SSA of the contribution of CAs to under-5 mortality and morbidity in the region. The review also highlighted the need to address diagnosis, prevention, surveillance and care to meet Sustainable Development Goals 3.2 and 3.8. The SSA sub-region faces unique challenges, including fragmentation of efforts that we hope to surmount through sSCAN via a multidisciplinary and multi-stakeholder approach.

## Introduction

Twenty-four percent of the world's under-5 population live in sub-Saharan Africa (SSA) [1], yet this region accounts for 50% of all deaths in this age group [2]. Projections suggest that the United Nations' (UN) Sustainable Development Goals (SDG) aiming to reduce the under-5 mortality rate to less than 25 per 1000 live births by 2030 (SDG-3) may not be achieved by 51 countries, two thirds of which are in SSA [3,4]. Congenital anomalies (CAs) are a major contributor to the high child morbidity and mortality in SSA. They are defined as structural anomalies that occur during intra-uterine life and can be identified prenatally, at birth, during infancy and in some cases, adulthood [5]. CAs are a sub-set of the broader birth defects collective, which also includes functional disorders [6].

Of the estimated 8.5 million new cases of CAs that occurred globally in 2019, 30% were in SSA [7]. Ranked as the 5<sup>th</sup> leading cause of death worldwide for children under-5 [4], CAs were responsible for an estimated 473,400 under-5 deaths in 2019 and represent approximately 9.4% of all under-5 deaths globally [7]. As progress continues to be made in addressing causes of infectious disease mortality in SSA, CAs will contribute greater proportion of child mortality. It is estimated that 90% of all severe CAs occur in low- and middle-income countries (LMIC) [5] and 38% of global deaths under-5 years due to CA are in SSA [7].

Despite the high burden of infant and under-5 mortality and morbidity related to CAs, these conditions appear to be a low priority on maternal and infant healthcare agendas in many SSA countries. From 2000 to 2015, the under-5 mortality rate due to CAs decreased by only 1% in SSA compared with 36% in North America and Europe [8]. There is no coordinated approach within the 49 countries of the sub-region to comprehensively address CAs and SSA remains the only region in the world without a CA surveillance network [9]. To address these gaps, SSA country representatives have established the sub-Saharan African Network for Congenital Anomaly Surveillance, Prevention and Care (sSCAN) [10]. To provide context for the activities of the Network, we conducted a scoping review to assess the current scope and depth of CA research within SSA.

Scoping reviews are a robust methodology to “systematically map the literature available on a topic” and to identify key concepts, theories and gaps in an area of research [11]. Such reviews explore the breadth and extent of available literature. They are often used to inform future research (as in this case) or as precursors to systematic reviews which are applied to more specific research questions [12–15].

The aim of this review is to determine the scope, objectives, and methodology of recent published research on CA in SSA, to categorize the focus of outputs (i.e., burden, surveillance, prevention, care) and identify potential stakeholders and researchers who may fall within sSCAN's remit.

## Materials and methods

The approach used for this scoping review was based on the Arksey and O'Malley methodology [12] with modifications from the Joanna Briggs Institute [16] guided by the PRISMA-ScR via the Cochrane network [17].

## Eligibility criteria

Original articles in English or French reporting on CAs in SSA as primary or secondary outcomes/objectives, focused on pregnancy (antenatal) care or involving infants or children <16 years, were included. An initial review to inform the study timeframe indicated that most articles were published in the last five years (Fig 1). Since sSCAN aims to consolidate current and future CA activities in SSA, the study period was limited to January 2016—June 2021. Systematic reviews were included to facilitate discussion. General literature reviews, editorials and letters lacking original data were excluded.

## Information sources and selection of papers

A detailed search was conducted in the Medline database, divided into four major sub-sections relevant to CA: 1) Burden, 2) Surveillance, 3) Prevention and 3) Care. The search included both MeSH and text terms. The following Boolean string searches were used for each major sub-heading:

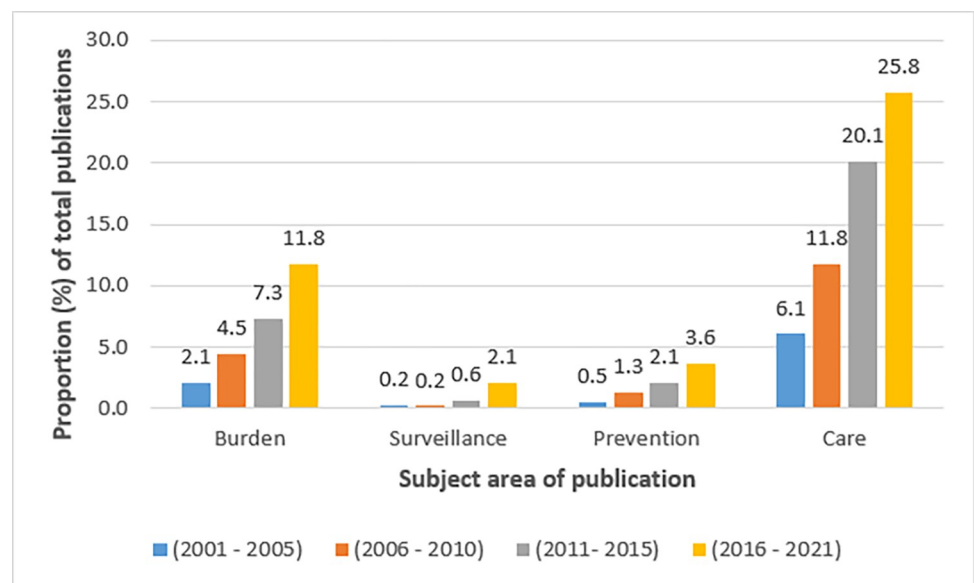

**Fig 1. Trends in publication of papers related to CAs in SSA from 2001–2021, by subject area (subject areas were not mutually exclusive).**

<https://doi.org/10.1371/journal.pgph.0001850.g001>

1. **Burden** (Burden OR prevalence OR infant/child mortality OR years of life lost/YLL OR disability adjusted life years/DALY OR cost of care OR economics OR survival outcome OR Survival) AND (congenital anomalies OR congenital abnormalities OR birth defect)
2. **Surveillance** (Population Surveillance OR Public Health Surveillance OR Surveillance OR Epidemiological Monitoring) AND (congenital abnormalities OR congenital abnormalities OR birth defect)
3. **Prevention** (Prevention OR folic acid supplementation OR vaccination OR infection OR nutrition, OR diabetes OR alcohol OR medication OR drugs OR smoking OR risk factors) AND (congenital anomalies OR congenital abnormalities OR birth defect OR Neural tube defect/NTD OR Congenital Rubella Syndrome)
4. **Care** (care OR surgery OR stigma OR neglect OR culture OR beliefs OR Barriers to care OR Rehabilitation OR prenatal diagnosis) AND (congenital anomalies OR congenital abnormalities OR birth defect OR NTD OR hydrocephalus OR cleft lip/palate OR CHD)

Search results from each subsection were merged and imported in Reworks where duplicates were removed. It is important to note that our search terms were in English only, although all French papers that were retrieved were evaluated.

Articles were assigned to ten pairs of sSCAN co-authors (~53 articles/pair), who evaluated eligibility using title and abstract (primary screening). Full text was obtained for eligible articles only.

## Data abstraction

The co-author pairs undertook secondary screening of full-text articles and abstracted key data elements into a standardized Data Collection Form developed using Microsoft Excel and piloted and finalized by all authors (S1 Data). The co-authors categorised papers according to burden, surveillance, prevention, or care (not mutually exclusive), with sub-categories within these areas, and further classified papers by methodology. Disagreements within/between author pairs were resolved via discussion. To optimize inter-rater reliability, six articles in each pair were reviewed by all authors. See S2 Data for extracted data from papers reviewed.

The author team defined disease surveillance as “a continuous and systematic process of collecting, analyzing and interpreting health-related data in order to monitor disease progression and establish patterns in a defined population”. Papers originating from an ongoing surveillance programme were classified under surveillance, where two types were distinguished: (1) Independent surveillance programmes focusing exclusively on CAs, and (2) Public health surveillance programmes which involve routine data collected by the Ministry of Health from all care facilities and included CA amongst other conditions. Studies classified as independent or public health surveillance were expected to have originated from established, ongoing initiatives.

## Data analysis

Abstracted data were merged and cleaned in Microsoft Excel. Using STATA Statistical Software (Release 15. College Station, TX: StataCorp), categorical variables were described using frequency counts and proportions. Two authors conducted a thematic analysis in Microsoft Excel for descriptive, thematic presentation of the papers. Additional qualitative analysis of full-text articles was undertaken using Atlas ti Windows (Version 9) to code themes and determine the frequency of specific emerging key topics.

## Results

### Selection of articles

The initial search identified 532 articles published between January 2016 and June 2021. Of these, 255 [18–272] studies were included in the final review after several rounds of screening (Fig 2).

### Trend of publications

The number of publications remained relatively constant between 2016 and 2020 (Fig 3), with a drop in 2021 (2 per month rather than 4 per month on average), considering the study period ending in June 2021.

### Distribution of publications by country

Final papers included originated from 26 of the 49 countries in SSA, with more papers from Eastern (38.6%) and Western (29.3%) Africa compared to Southern (17%) and Central

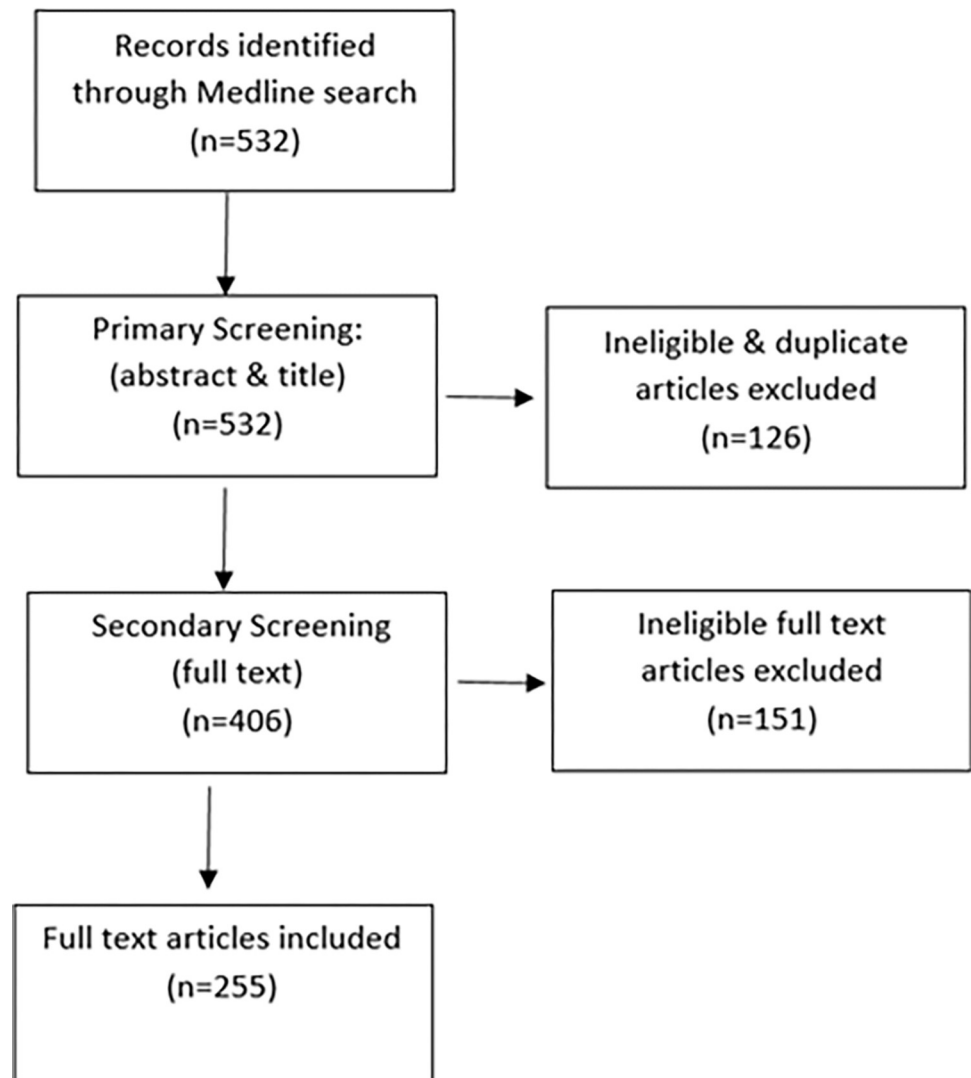

**Fig 2. PRISMA study selection flow chart outlining screening process.**

<https://doi.org/10.1371/journal.pgph.0001850.g002>

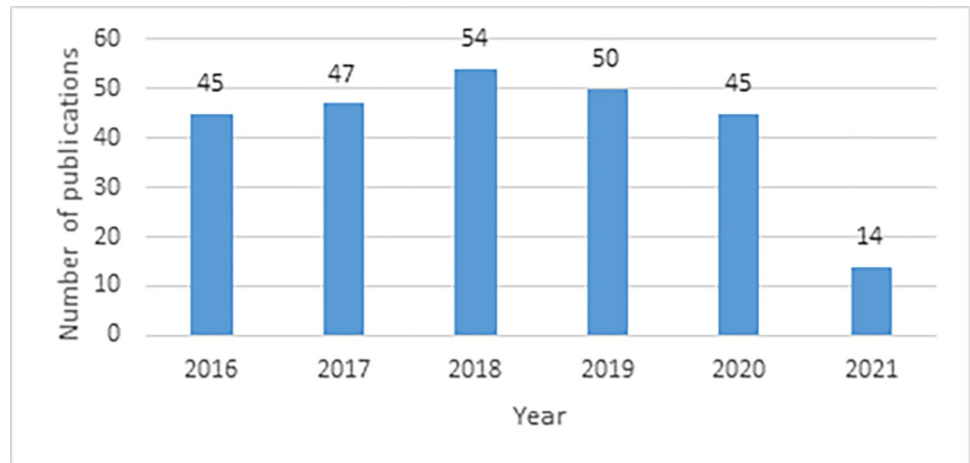

**Fig 3. Number of publications per year (2016 –June 2021).**

<https://doi.org/10.1371/journal.pgph.0001850.g003>

(10.4%) Africa (Fig 4; S1 Table). Papers from Nigeria (22.0%), Ethiopia (14.1%), Uganda (11.7%) and South Africa (11.7%) accounted for almost 60% of the total. Several papers were global reviews including some SSA countries (4, 1.6%) or studies involving multiple countries within SSA (14, 5.5%).

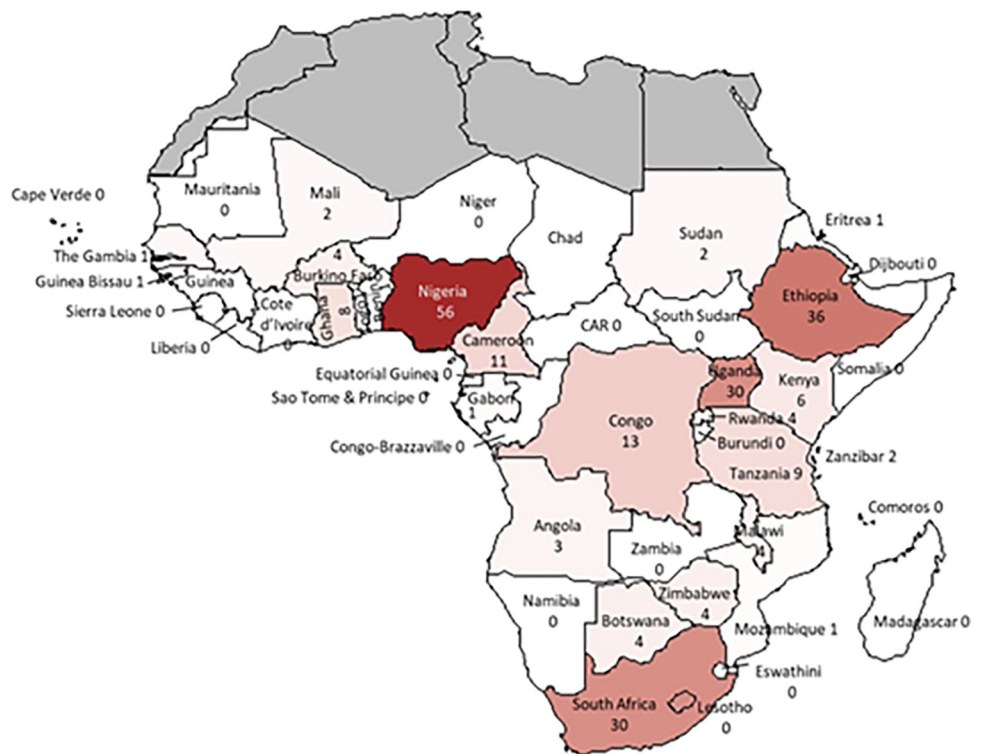

**Fig 4. Number of articles reviewed by country (darker colour indicating higher number of articles).** Source: Created using the R software (coordinates obtained using map\_data and plotted using ggplot).

<https://doi.org/10.1371/journal.pgph.0001850.g004>

## Types of CAs

Most of the papers reviewed had CA as their primary focus (85%) and investigated a single CA type (88%). Central Nervous System (CNS) (19%), cardiac (17%), craniofacial (15%) and gastro-intestinal (12%) anomalies were the four most investigated CAs (Fig 5). S2 Table shows breakdown of specific CA types investigated.

## Focus areas and objectives

Fig 6 shows the distribution of articles across the four major subject areas (burden, surveillance, prevention, and care), with a further breakdown into sub-areas. Single case studies were excluded from the thematic analysis.

### a. Burden

A total of 145 (56.9%) papers addressed issues related to burden, making it the most published topic.

#### i. Prevalence

Studies of prevalence ( $n = 83$ ) provided data regarding the prevalence at birth or during childhood (e.g., among school children) of specific CAs ( $n = 60$ ) or a range of CAs ( $n = 23$ ). Most were hospital-based studies, either from a single ( $n = 37$ ) or multiple ( $n = 27$ ) hospitals. A few were population-based studies (e.g., [60,61,94]), and surveys of school children (e.g., [33,63,184]). Reporting on prevalence was often a secondary objective of single hospital studies addressing surgery and care, or of cohort or case-control studies of risk factors and prevention. Prevalence data were accompanied by additional descriptive epidemiology, such as sex ratio, maternal age distribution or other sociodemographic variables, and the clinical characteristics of cases.

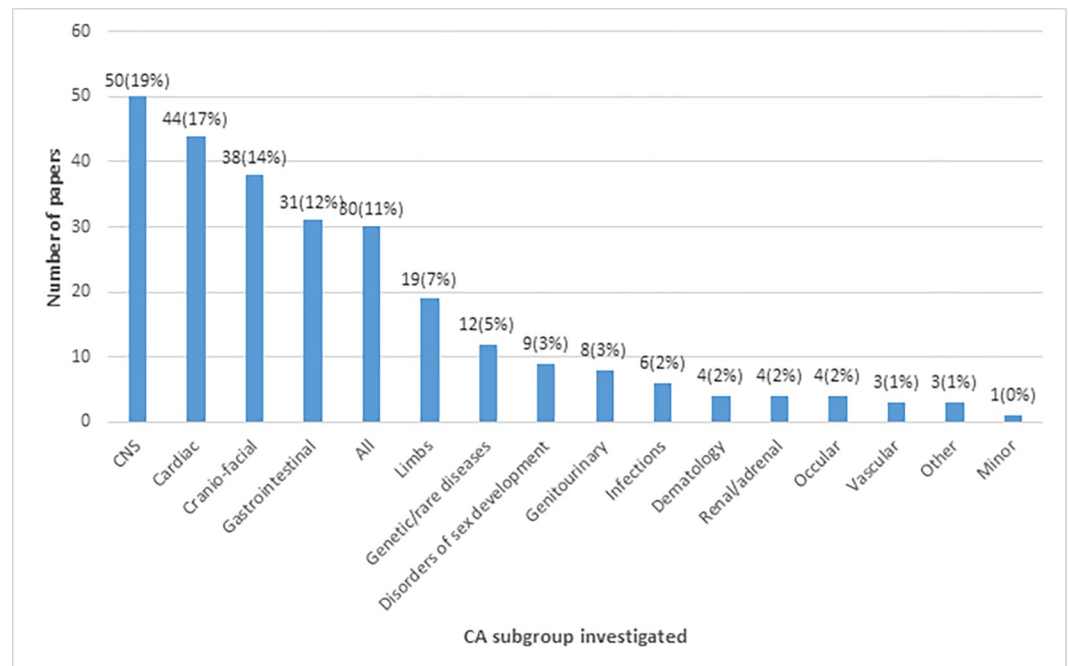

**Fig 5. Number of publications per type of congenital anomaly.**

<https://doi.org/10.1371/journal.pgph.0001850.g005>

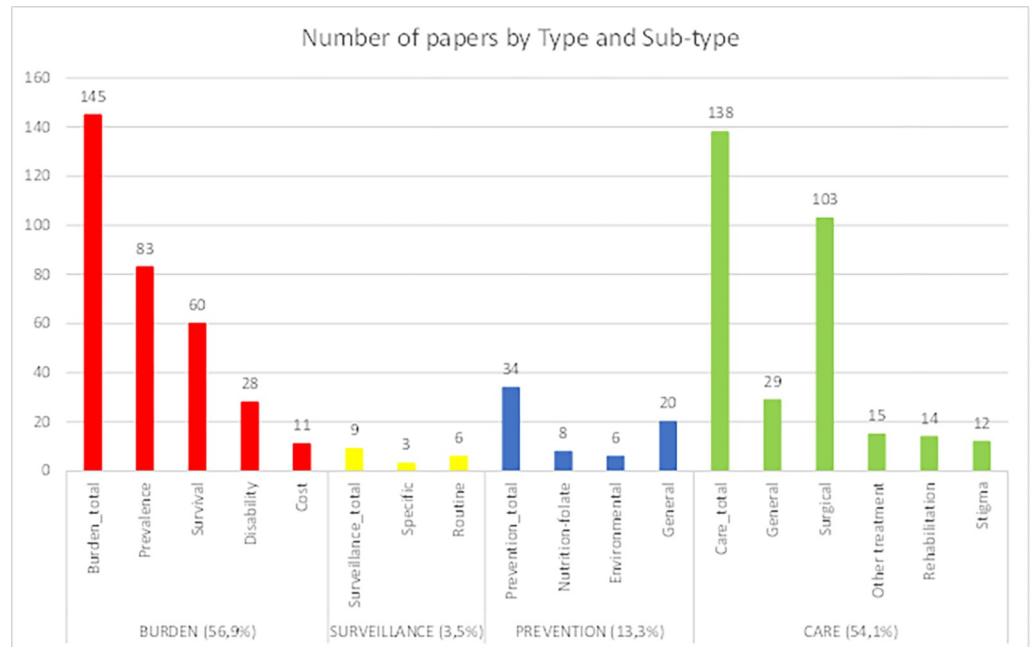

**Fig 6. Distribution of papers across the four key categories.**

<https://doi.org/10.1371/journal.pgph.0001850.g006>

### ii. Survival

Survival papers mainly looked at survival of babies with CA admitted for surgical care (e.g., [19,28,54,66,76,89]). The period of survival was mainly during the first year of life, or in the days/months following surgery, with no long-term survival studies. In some studies, mortality of babies with CAs was included as part of an investigation into all causes of neonatal death (e.g., [29,150,264]). In others, mortality was reported as an outcome following implementation of a new care protocol (e.g., [54]); or as rates of termination of pregnancy for fetal anomaly following prenatal diagnosis (e.g., [84,87]). Most studies (88.3%) investigated survival for a single CA, of which neural tube defects (NTD; hydrocephalus/spina bifida (25.0%) and congenital heart disease (CHD; 18.3%) were the most common, followed by gastrointestinal anomalies such as atresias (15%) and gastroschisis (5%).

### iii. Disability

Papers focusing on disability generally investigated how living with untreated CA affected physical/functional capacity (e.g., [63,103,109,134]), with some reporting on associated comorbidities (e.g., [64,75]). One paper [134] evaluated self-reported quality of life of children living with spina bifida compared to unaffected children. A few papers investigated the impact on the quality of life for mothers (e.g., [30,195,256]) and caregivers of affected children (e.g., [25,31]). One paper [214] derived disability weights, used to calculate Years Lived with Disability (YLD). Orofacial clefts (OFC) (21.4%) were the most CA investigated in relation to disability, with clubfoot (7.1%) and intestinal atresia (7.1%) also noted.

### iv. Cost of Care

For the 11 papers identified for this category, the focus was upon cost of care in relation to financial challenges influencing access to care and poor outcomes (e.g., [25,31,89,236]), alongside social challenges [31,175]. Papers on cost of care primarily focused on CHD (45.5%) and



OFC (27.3%), relating to the financial burden of individuals accessing care (and the impact on care seeking) rather than the cost to the health system. A further 105 papers mentioned the financial burden of CA facing families but did not collect or analyse data on this issue.

## b. Surveillance

Papers that reported on long-term ongoing collection and analysis of CA data were categorized as surveillance. These reported on prevalence (included also in Burden), or on risk factors (also included in Prevention). Surveillance data originated from the routine collection of data by the public health system across many diseases ( $n = 6$  [60,77,78,94,129,249]), or from specific independent initiatives ( $n = 3$  [86,99,100]). Eight of the nine surveillance papers addressed a single type of CA (spina bifida ( $n = 4$ ), congenital rubella syndrome ( $n = 3$ ) and microcephaly ( $n = 1$ ). A further 38 (15%), mentioned surveillance, mainly in relation to the need for more comprehensive surveillance of CA.

### a. c. Prevention

Thirty-four (13.3%) papers addressed issues related to prevention, either known risk factors such as folic acid, or other potential causes of CA.

#### i. Folic Acid

Eight (23.5%) of the 34 papers on prevention focused on folic acid, most commonly reporting on the use of folic acid by mothers in the context of NTD and/or hydrocephalus (e.g., [22,105,123,124,132,164]). Four papers focused on barriers to [34], awareness of the benefit of [49], and estimation of potential reduction in the rate of NTD and hydrocephalus due to folic acid use [94]; and modelling of potential prevention of under-5 mortality [94]. A further 47 (18.4%) papers mentioned folic acid but did not collect specific data.

#### ii. Maternal infections including Rubella

Six papers focused solely on rubella or rubella vaccination [60,129,145,176,232,249], addressing rubella infection prevalence among women, immunity in adolescents, screening, and the baseline prevalence of congenital rubella syndrome prior to the introduction of immunization (60). A further 17 papers mentioned rubella or rubella vaccination but did not collect specific data [26,34,55,64,70,73,78,83,88,123,153,164,165,192,238,242,244]. One paper investigated the emergence and circulation of Zika virus in SSA [78].

#### iii. Environmental Exposures

The two main categories of risk factors investigated were medication safety in pregnancy ( $n = 8$ , [70,96,99,100,123,159,164,207]), and environmental pollution ( $n = 6$ ). Most medication safety studies evaluated a series of medications (including herbal) as part of a general CA risk factor assessment [70,96,123,164], while a few evaluated the safety of a single medication type/class (antiretrovirals [99,100] and antimalarials 207) or general medication use in pregnancy [159]. There were no papers on common medicines used for non-infectious diseases, or on the impact of vaccination during pregnancy. Herbal remedies and traditional medicine featured prominently in 34 papers, including those which did not collect data.

Papers on environmental pollution focused particularly on exposure to extraction metals such as copper, cobalt, mercury and arsenic [67,70,71,95]. A further 16 papers mentioned environmental pollution, but did not collect specific data [26,34,44,50,67,70,71,88,95,96,105,132,160,164,183,216,222,227,232,237].

A cluster of 13 papers specified radiation exposure during pregnancy as a concern [19,33,34,62,70,76,105,107,132,148,188,202,203].

#### d. Care

Care was the second most common area investigated after burden, and the focus of 138 (54.1%) papers, mainly aimed at describing and improving treatment and care outcomes.

##### *i. Surgical care*

There were 103 papers related to surgical care, of which 36% focused on surgery outcomes. The main surgical areas were cardiac (23.4%), CNS (for NTD and hydrocephalus; 20.8%), gastrointestinal (predominantly anorectal malformations; 18.8%), OFC (14.9%) and orthopedics (predominately congenital talipes; 11%). Papers focused on different issues, including challenges faced by patients in accessing surgical care e.g. [25,35,37] (including due to COVID-19, [57]); and performing surgery for complex anomalies [37,38]; the quality of peri- and/or post-operative surgical care (e.g., [32,33]); outcome/survival after surgery (e.g., [19,89,120]); and developing cost-effective, local surgical management tools (e.g. management silos for gastro-schisis [58]). Notably, late or missed CA diagnosis either due to late presentation, lack of access to care, or shortage of diagnostic expertise was addressed in several papers (e.g., [28,81,91,110,114]). For example, one paper investigating access to care by caregivers of children with congenital heart defect (CHD) concluded, “Delayed access to care was largely due to the lack of early CHD recognition and financial hardships related to the inefficient and disorganized health care system” [25]. Papers also reported case series, including patient characteristics, and clinical characteristics and complications, to aid service planning and improvement.

##### *ii. Rehabilitative care*

Papers on rehabilitation constituted 5.5% of all papers reviewed and addressed issues such as evaluation of training of rehabilitation care professionals and the quality of care provided (e.g., [20,46]), effectiveness of specific rehabilitation techniques (e.g. [91,109]), characteristics of children with untreated CA presenting for rehabilitative care (75), and opinion of caregivers regarding cosmetic care (e.g. plastic surgery) (e.g. [102]). OFC (42.9%) and clubfoot (35.7%) were the most common anomalies investigated in relation to rehabilitative care. Speech therapy and plastic surgery were common topics included for children with OFC.

##### *iii. Stigma and related cultural issues affecting care*

Papers on stigma and related cultural issues (n = 12) were often based on surveys administered to care givers (mostly mothers) of children with CAs and addressed issues such as the influence of stigma on the quality of care (e.g., [30,34]), social/cultural barriers to uptake of preventive measures [31], prenatal screening [116] and treatment [31], genital reconstruction in disorders of sex development [120,128], plastic surgery [102], community rejection and abandonment by spouse [31,175], as well as health system responsiveness [175]. Some papers documented family and community beliefs about the causes of CA, e.g., witchcraft, contraception, and the guilt of the mother [31,116,241]. Beliefs and perceptions about the efficacy of medical care, preference for traditional medicine [241], and parental/community believes on whether treatment should be sought [31,241] were also included.

##### *iv. Other themes relating to Care*

Eight of the care papers [20,46,57,72,114,154,180,258] were system-focused rather than addressing specific care, and these included training, professional development and service delivery, and multidisciplinary teams. These described how training and service organization initiatives have improved care.

Seven papers reported on the experiences of healthcare of parents and caregivers, and their healthcare-seeking behaviours [25,31,44,102,166,179,241]. These studies interviewed parents and caregivers to find out about their navigation of the healthcare system, documenting difficulties in obtaining a diagnosis, and accessing specialist care.

Fourteen papers reported on dysmorphology or genetics [42,56,59,103,120,128,133,170,210,212,224,246,271]. These studies undertook detailed examinations of babies with CA to understand the range of dysmorphologies, and the associations between different anomalies. One paper focused on ethnic differences in minor anomalies [42]. Several papers reported the genetic distribution of disorders of sex development [59,120,128,224].

Seven papers investigated the results of prenatal diagnostic services [65,84,87,116,161,188]. These addressed the problem of limited information about prenatal screening of CA via ultrasound, including how often it is conducted, role of counseling, rate of parents' acceptance of the screening and termination when a diagnosis is made, as well as its overall value supporting early diagnosis and care.

## Methodologies

Six aspects of study methodology were examined: study type, population coverage, data source, type of birth, age at CA diagnosis, and expert confirmation of CA diagnosis (Table 1).

Case studies/case series (26.6%) were the most common study type with a considerable number of cross-sectional surveys (17.6%), retrospective record reviews (17.3%), and cohort studies (17.2%). For population coverage, most studies (60.4%) were conducted in a single hospital, with few population-based studies (9%). Data were mainly sourced from retrospective review of clinical records (56.1%) or via interviews with caregivers (34.9%). Very few papers included stillbirths (7.5%), TOPFA (2.4%) or prenatally diagnosed CAs (3.5%). For most papers (58.8%) the CA diagnosis was confirmed by an expert.

## Discussion

### Trends in CA-related publications in SSA

This scoping review revealed an increase in CA-related publications in SSA within the last decade. This may reflect increased awareness among researchers and stakeholders during this period, stemming from CA-related events such as: 2010 World Health Assembly (WHA) Birth Defects Resolution 63.17 that called for the strengthening of birth defect surveillance systems globally and nationally [273]; and the series of birth defect surveillance training sessions in SSA organized by the International Clearinghouse for Birth Defects Surveillance and Research (ICBDSR) in 2014 and 2015 [274]. This publication trend mirrors the proportional increase of CA as a cause of childhood mortality and morbidity as infectious causes decline. For example, from 2000 to 2017, the number of under-5 deaths in Africa due to CAs increased by 31,000 (19%), in contrast to HIV/AIDS and measles for which under-5 deaths decreased by 144,000 (-68%) and 277,000 (86%), respectively [8].

Most studies addressing CAs included in the review were undertaken in a handful of countries, with 66% of countries in the region publishing no research on these conditions. This highlights the extent to which CA-related research is neglected in SSA despite the high disease burden. Most studies were confined to specific countries/institutions with minimal cross-border collaboration to support and strengthen surveillance and care. Disseminating research on CAs and their relative contribution to childhood mortality and morbidity is vital to provide an evidence base for investment in initiatives aimed at primary, secondary and tertiary prevention. This review highlights the importance of initiatives such as sSCAN in building awareness

**Table 1. Proportion of studies across different methodologies.**

| Method element                          | n (%)      |
|-----------------------------------------|------------|
| <b>Type of study</b>                    |            |
| Case study/case series <sup>a</sup>     | 67 (26.6)  |
| Cross-sectional survey                  | 45 (17.6)  |
| Retrospective record review             | 44 (17.3)  |
| Cohort study                            | 44 (17.2)  |
| Case-control study                      | 16 (6.3)   |
| Descriptive Epidemiology                | 11 (4.3)   |
| Diagnostic study                        | 8 (3.1)    |
| Systematic review                       | 7 (2.7)    |
| Qualitative study                       | 6 (2.3)    |
| Economic/costing                        | 2 (0.8)    |
| Modelling                               | 2 (0.8)    |
| Intervention                            | 2 (0.8)    |
| Other <sup>b</sup>                      | 1 (0.4)    |
| <b>Population coverage</b>              |            |
| Single hospital                         | 154 (60.4) |
| Multiple hospital                       | 53 (20.8)  |
| Population-based                        | 23 (9.0)   |
| Not given                               | 25(9.8)    |
| <b>Data source</b>                      |            |
| Clinical records                        | 143 (56.1) |
| Interviews with care-givers             | 90 (35.3)  |
| Published literature <sup>c</sup>       | 9 (3.5)    |
| Surveillance data                       | 5 (2.0)    |
| Laboratory-based (biological samples)   | 3 (1.2)    |
| Smile Train database                    | 2 (0.8)    |
| Recommendations                         | 1 (0.4)    |
| Other <sup>b</sup>                      | 1 (0.4)    |
| <b>Type of birth</b>                    |            |
| Live birth                              | 195 (76.5) |
| Still birth                             | 19 (7.5)   |
| Termination of Pregnancy                | 6 (2.4)    |
| Not given                               | 50 (19.6)  |
| <b>Age of diagnosis</b>                 |            |
| Any                                     | 45 (17.6)  |
| At birth                                | 51 (20.0)  |
| Child                                   | 68 (26.7)  |
| Prenatal                                | 9 (3.5)    |
| Not given                               | 70 (27.5)  |
| <b>Expert confirmation of diagnosis</b> |            |
| Yes                                     | 150 (58.8) |
| No                                      | 12 (4.7)   |
| Not given                               | 79(31.0)   |

<sup>a</sup> Includes 25 single case studies.

<sup>b</sup> *Development of a low-cost material for the treatment of gastroschisis.*

<sup>c</sup> *Systematic review.*

<https://doi.org/10.1371/journal.pgph.0001850.t001>

around the burden of CAs in the region, creating a network of support and collaboration for researchers and clinicians, and advocating for better access to care.

### **Delay in diagnosis and the impact on care outcomes**

As expected, the majority of CAs featured in this review are visually obvious, external conditions, including NTD and other CNS conditions, cranio-facial and gastrointestinal anomalies. While CHD also featured, the burden of these internal and other less obvious anomalies and functional congenital disorders (single gene disorders and rare diseases) requiring additional diagnostic tools continue to be under-diagnosed and under-reported due to misdiagnosis and premature mortality incorrectly reported. This prevents an accurate assessment of the contribution of these conditions to the disease burden. Literature is lacking on survivorship and the proportion of those receiving an accurate diagnosis and relevant treatment and developing this baseline essential.

Lack of screening is a major contributor to the high rate of missed and delayed CA diagnosis in SSA. While conducting a surface examination of all newborns is standard practice, it requires appropriate skills and capacity. In an attempt to address this, the WHO/CDC/ICBDSR has recently launched a birth defect surveillance toolkit with checklists to improve efficiency and data quality [275]. Recent reports indicating many SSA countries are gradually implementing pulse oximetry for postnatal screening of CHD [276] is encouraging, although poor performance concerns related to use of this technology in darker-skin babies are emerging [277,278]. High resolution, prenatal ultrasound screening for CAs remains limited in LMIC due to the expensive equipment and skilled personnel required. Recent advances in technology offer low-cost, compact mobile ultrasound devices, dramatically increasing the availability of ultrasound services in LMICs [279,280]. The expertise required to perform a fetal anomaly ultrasound scan still presents a major barrier. Emerging artificial intelligence solutions, automatically detecting CAs and capturing accurate images may allow less-skilled personnel to perform the procedure in the future [281].

### **Training, service development and surgical care**

Given the rising burden of CAs and lack of expertise in SSA, there is an urgent need to increase clinical capacity to treat correctable CAs. While the number of paediatric surgeons in SSA is increasing, numbers of other important personnel such as specialist paediatric surgical nurses, intensive care personnel, paediatric anaesthesiologists, clinical geneticists, radiologists, and neonatologists remain low.

Historically, surgical camps or global outreach teams have filled this gap, but these are less sustainable than upskilling local providers, and often reach only a few of those requiring care [282,283]. While some initiatives transfer skills and develop local expertise, many make little local impact. To succeed, such initiatives must be locally driven by individual champions in SSA with continued capacity-building of local teams following the intervention. Some collaborative efforts with HIC-based organizations have seen significant success in the treatment CAs in SSA. These are often single disease programmes, such as Smile Train ([www.smiletrain.org](http://www.smiletrain.org)) which focuses exclusively on OFC.

### **Awareness and access to care**

Poor health literacy and education across SSA is a significant barrier to navigating the health system, especially for those impacted by CA. This is compounded by the lack of well-coordinated care for babies diagnosed with CA. Knowing how, where and when to access appropriate care, especially in rural areas with vast geographical distances may be overwhelming. Specialist

treatment centers are mainly located in urban centres, significant distances away from birthing centres. Long-distance travel on poor roads with inadequate public transport infrastructure pose a risk to vulnerable infants, in addition to the cost implications for the family. Most families in SSA live below the poverty line and cannot cover out-of-pocket healthcare costs, combined with additional living costs, childcare for siblings and lost earnings. Seeking care for the child affected by a CA may require overcoming insurmountable barriers.

State-funded insurance schemes and government subsidies could dramatically improve the care of affected children combined with telemedicine to facilitate remote care, limiting costs and travel. The most pressing need is for CAs to be integrated into mainstream primary health care systems in SSA, with a well-coordinated system to promote prevention, screening, diagnostics and care. This could be championed by initiatives such as sSCAN in collaboration with governments, local organizations, patient advocacy and support groups and other external stakeholders.

### Surveillance and prevalence data

Studies assessing prevalence in this review reflected the challenges faced in establishing the baseline birth prevalence of CAs in the sub-region. Most studies involved hospital-based data, predominantly in a single hospital, with only three studies [60,61,94] assessing population-based prevalence. High rates of home-based deliveries, limited diagnostic capacity and clinical expertise are only a few of the barriers researchers face in determining the true burden of CAs in SSA. The few existing surveillance projects have been driven by the need to assess medicine safety during pregnancy such as antiretrovirals and antimalarials. Surveillance systems in Botswana, South Africa, Malawi, and Uganda have focused on assessing the safety of antiretrovirals in pregnancy and birth outcomes, including CAs. As the pipeline of novel medicines, vaccines and other health technologies expands, such projects are likely to increase in the region, providing an opportunity to build capacity around CA surveillance and generate much needed empiric data on CAs [284].

### Prevention

Primary prevention (i.e. preventing CA-affected pregnancies) is the ideal approach to reducing the CA burden of disease [285]. This requires optimized prenatal and perinatal nutrition (e.g., folate fortification to decrease NTD risk), reduced exposure to known teratogens (e.g. infections, alcohol, prescribed and recreational drugs), and research to establish the teratogenicity of environmental exposures where evidence is lacking or limited. A broad, integrated primary prevention strategy for CAs in SSA should be envisaged. This review revealed limited research activity in this area.

In addition to reducing risk factors (e.g. maternal diabetes, infections, toxic exposures) improving maternal folate status by food fortification is a highly effective primary prevention strategy. This has been proven to prevent a substantial fraction of severe NTDs, especially spina bifida and anencephaly, as well as addressing anaemia [286]. Six of the 18 countries identified for their potential to maximize reduction in anemia and NTD through large-scale fortification are in SSA. Encouragingly, this scoping review has identified several publications addressing aspects of folic acid-related prevention. However, much more can be done to help translate the promise of folic acid into meaningful reduction in NTDs.

Secondary prevention strategies reduce the number of CA affected births (including prenatal diagnosis, genetic counselling and option of TOPFA while tertiary prevention strategies involve the early diagnosis of CA (even prenatal) with prompt treatments to prevent complications and mitigate disability [287].

## Risk factors

The limited scientific evidence-base related to CA associated with medication use in early pregnancy is a global issue, but in SSA there are additional concerns relating to the widespread use of essential medicines for the prevention and treatment of infectious diseases such as malaria and HIV [288,289], and the high prevalence of herbal medication use [290]. Inadequate research on medication safety in pregnancy may delay access by pregnant women to treatments with an optimal benefit-risk profile for both mother and baby. There is also a need to monitor and respond to the use of medicines with a known teratogenic profile.

Maternal infections are a well-established cause of CAs. However, other than rubella, the only other infectious disease related to CAs included in this review was the Zika virus. First recorded in Uganda, Zika has received global attention following an epidemic in Latin America starting in 2015, causing severe microcephaly [291]. The extent of microcephaly risk relating to Zika in Africa, where both the specific virus and mosquito differ from those in Latin America, is unknown due to the lack of functioning surveillance systems in the sub-region. Other diseases requiring more attention include congenital syphilis [292], toxoplasmosis [293,294], and cytomegalovirus [295,296], due to their higher prevalence in SSA. Compounding effects of multiple infections (co-morbidities) affecting the fetus, and interaction with malnutrition and other exposures also require consideration.

Environmental air, water and soil pollution is an ongoing concern with particularly high levels reported in African countries of heavy metals and pesticides [297]. Five studies in this review researched environmental pollutants in relation to CA risk, three of which were undertaken due to widespread contamination from mining operations [67,71,95].

No studies on dietary factors (other than folic acid) were included in this review, but several, very specific practices such as “chewing of khat” [70] were identified. While Fetal alcohol spectrum disorder (FASD) is a significant public health problem in many communities, including in SSA [298], this review did not include search criteria to identify studies addressing alcohol or smoking during pregnancy. Due to the difficulty in diagnosing FASD at birth, such a review would not be comprehensive. With the increasing prevalence of obesity and diabetes in African countries [299], periconceptional management of diabetes to prevent CHD and other CA is becoming more important. No papers in the review addressed this issue.

Although this review did not investigate the relationship between socioeconomic status and CAs, it was noted that extreme poverty is particularly prevalent in rural areas of SSA, where it is most difficult to obtain reliable data on CAs caused by a combination of nutritional deficiencies, infections, and environmental exposures. It can therefore be concluded that poverty both causes CA and is associated with poor access to treatment and poor outcomes.

## Influence of culture

Few papers in this review addressed issues related to stigma and culture. SSA is one of the most culturally diverse regions of the world [300], with deeply rooted cultural and social underpinnings that influence health-seeking behavior. Across the region, the process of pregnancy and birth is regarded as “secret” and associated with varied cultural and spiritual dimensions. Notably, the birth of a baby with CA often carries stigma and varied cultural/social interpretations as to the cause and approaches to treatment. Strategies to address CA in SSA must therefore include robust attempts to fully understand associated cultural and social challenges and to develop mitigation frameworks that include holistic approaches involving the entire community. A starting point could be to learn from the challenges and successes of similar stigma addressing related conditions such as HIV/AIDS [301]. Particular attention must also be given to the cultural and social factors that influence the use of traditional medicines during

pregnancy and for the management of CAs. This has become even more urgent with the current WHO plan to incorporate traditional medicine into mainstream healthcare systems in SSA [302].

### Health information systems

Comprehensive, formalized and centralized electronic health record (EHR) systems are scarce in SSA, seriously impacting the availability of empiric surveillance data for CAs. This is highlighted by the limited literature reporting on surveillance systems and the dominance of hospital record reviews and interviews as data sources. The lack of EHR systems makes wide-scale linkage of pregnancy exposures and neonatal outcomes extremely challenging. There is a need to build awareness around the importance of accurate, quality data as an evidence-base to better inform resource allocation and clinical decisions, and to motivate for investment in EHR systems in the region.

The high rates of out-of-facility deliveries in some countries, fragmented obstetric services and resource constraints with respect to expertise, funding, and information and communication technology (ICT) challenge the implementation and maintenance of EHRs [303,304]. In the last 20 years there has been remarkable improvement in the ICT infrastructure across SSA, and the proliferation of mobile devices [304]. Recently, the African Union expanded its Digital Transformation Strategy for Africa for a further 10 years. These developments present an exciting opportunity to improve upon EHR data capture. Within such a resource-constrained environment even minimal expansion of system coverage could be implemented for targeted disease areas, as has been the case with HIV/AIDS [305]. Uptake of innovative tools such as the new Global Birth Defects app specifically designed to facilitate diagnosis of CAs for surveillance programs operating in low resource settings such as SSA [306], should be maximized.

### Strengths and limitations

This is the first scoping review investigating recent literature on CA in SSA. It was conducted to inform the activities of the newly established sSCAN and designed to maximise network involvement evaluating and interpreting the literature. This approach may have led to inconsistencies in the categorization of papers between data abstractor groups. While this was mitigated as far as possible via the use of a standardized data extraction form accompanied by specific instructions and training, misclassification remains a possibility.

The results of the literature search were dependent upon the inclusion of CA and associated MESH terms as key words in the literature. Some papers on risk factors may have been missed if they were not specifically related to CA. For example, whereas maternal infections are risk factors for CA, but papers on maternal infections would only be included in this review if they related this risk factor to CA.

To facilitate reporting, papers were categorized into four main groups identified by author consensus. This categorization may be perceived as being arbitrary. For example, papers on stigma were allocated to a sub-category under Care but may just as easily be considered to relate to the sub-category of disability under burden. Similarly, cost of care was categorized under burden, but many papers related to financial costs to the patient/family and were a major element in papers regarding Care. This was mitigated by describing details on the objectives of papers and concerns of the authors in each category. The categories were also not mutually exclusive, and so papers could be allocated to multiple categories.

The timeframe of this review was limited to a five-year period to represent the “current” situation regarding research activity relating to CA in SSA, and the situation following the 2010 WHA Resolution 63.1. It was not our purpose to review all literature regarding CA in SSA.



Additionally, the focus on obvious CA, a sub-set of congenital disorders, excluded less obvious structural anomalies as well as functional conditions, including most single gene disorders [6].

## Conclusion

There is increasing awareness and recognition among researchers in SSA of the growing contribution of CAs to under-5 mortality and morbidity in SSA together with the need to address diagnosis, prevention, surveillance and care of these conditions to meet SDG3.2 and 3.8 2030 targets [3]. SSA has specific challenges in relation to CAs and needs to formulate an approach to address these. The newly formed sSCAN can champion this course through a comprehensive, multidisciplinary and multi-stakeholder approach that involves national governments, local institutions, patient organizations, and relevant international organizations such as WHO, to ensure that opportunities for primary prevention are fully implemented and those impacted by CA receive optimal care and are not left behind.

## Supporting information

### **S1 Table. Regional distribution of studies across sub-Saharan Africa.**

(DOCX)

### **S2 Table. Congenital Disorders (not mutually exclusive).**

(DOCX)

### **S1 Data. Data extraction template.**

(XLSM)

### **S2 Data. Data extracted from papers reviewed.**

(XLSX)

## Author Contributions

**Conceptualization:** Aminkeng Zawuo Leke, Helen Malherbe, Emma Kalk, Ushma Mehta, Phylis Kisa, Lorenzo D. Botto, Idowu Ayede, Lee Fairlie, Nkwati Michel Maboh, Ieda Orioli, Rebecca Zash, Ronald Kusolo, Daniel Mumpe-Mwanja, Robert Serujogi, Bodo Bongomin, Caroline Osoro, Clarisse Dah, Olive Sentumbwe–Mugisha, Hamisi Kimaro Shabani, Philippa Musoke, Helen Dolk, Linda Barlow-Mosha.

**Data curation:** Aminkeng Zawuo Leke, Helen Malherbe, Emma Kalk, Ushma Mehta, Phylis Kisa, Lorenzo D. Botto, Idowu Ayede, Lee Fairlie, Nkwati Michel Maboh, Ieda Orioli, Rebecca Zash, Ronald Kusolo, Daniel Mumpe-Mwanja, Robert Serujogi, Bodo Bongomin, Caroline Osoro, Clarisse Dah, Olive Sentumbwe–Mugisha, Hamisi Kimaro Shabani, Philippa Musoke, Helen Dolk, Linda Barlow-Mosha.

**Formal analysis:** Aminkeng Zawuo Leke, Helen Malherbe, Emma Kalk, Phylis Kisa, Ieda Orioli, Helen Dolk, Linda Barlow-Mosha.

**Funding acquisition:** Aminkeng Zawuo Leke, Helen Malherbe, Emma Kalk, Ushma Mehta, Helen Dolk, Linda Barlow-Mosha.

**Investigation:** Aminkeng Zawuo Leke, Helen Malherbe, Emma Kalk, Lorenzo D. Botto.

**Methodology:** Aminkeng Zawuo Leke, Helen Malherbe, Emma Kalk, Ushma Mehta, Phylis Kisa, Lorenzo D. Botto, Idowu Ayede, Lee Fairlie, Nkwati Michel Maboh, Ieda Orioli, Rebecca Zash, Ronald Kusolo, Daniel Mumpe-Mwanja, Robert Serujogi, Bodo Bongomin,

Caroline Osoro, Clarisse Dah, Olive Sentumbwe–Mugisha, Hamisi Kimaro Shabani, Philippa Musoke, Helen Dolk, Linda Barlow-Mosha.

**Project administration:** Aminkeng Zawuo Leke, Helen Malherbe, Emma Kalk, Helen Dolk, Linda Barlow-Mosha.

**Resources:** Emma Kalk.

**Supervision:** Helen Malherbe.

**Writing – original draft:** Aminkeng Zawuo Leke, Helen Malherbe, Emma Kalk, Ushma Mehta, Phylis Kisa, Lorenzo D. Botto, Helen Dolk, Linda Barlow-Mosha.

**Writing – review & editing:** Aminkeng Zawuo Leke, Helen Malherbe, Emma Kalk, Ushma Mehta, Phylis Kisa, Lorenzo D. Botto, Idowu Ayede, Lee Fairlie, Nkwati Michel Maboh, Ieda Orioli, Rebecca Zash, Ronald Kusolo, Daniel Mumpe-Mwanja, Robert Serujogi, Bodo Bongomin, Caroline Osoro, Clarisse Dah, Olive Sentumbwe–Mugisha, Hamisi Kimaro Shabani, Philippa Musoke, Helen Dolk, Linda Barlow-Mosha.

## References

1. United Nations Department of Economic and Social Affairs Population Division. World Population Prospects 2022. 2019.
2. Sharrow D, Hug L, Liu Y, You D. Levels and Trends in Child Mortality-Report 2020-Estimates developed by the UN Inter-agency Group For Child Mortality Estimaion'. United Nations Inter-agency Group for Child Mortality Estimation (UN IGME). 2020.
3. United Nations General Assembly. United Nations Transforming Our World: The 2030 Agenda for Sustainable Development. Division for Sustainable Development Goals: New York, NY, USA. 2015.
4. Perin J, Mulick A, Yeung D, Villavicencio F, Lopez G, Strong KL, et al. Global, regional, and national causes of under-5 mortality in 2000–19: an updated systematic analysis with implications for the Sustainable Development Goals. *The Lancet Child & Adolescent Health*. 2022; 6(2):106–15. [https://doi.org/10.1016/S2352-4642\(21\)00311-4](https://doi.org/10.1016/S2352-4642(21)00311-4) PMID: 34800370
5. World Health Organization. Birth Defects Fact Sheet. 2022.
6. World Health Organization. Management of Birth Defects and Haemoglobin Disorders. Report of a Joint who-March of Dimes Meeting. Geneva, Switzerland, 17–19 May 2006. Geneva: World Health Organization, 2006.
7. Vos T, Lim SS, Abbafati C, Abbas KM, Abbasi M, Abbasifard M, et al. Global burden of 369 diseases and injuries in 204 countries and territories, 1990–2019: a systematic analysis for the Global Burden of Disease Study 2019. *The Lancet*. 2020; 396(10258):1204–22. Supplementary Appendix 2E: [https://www.thelancet.com/cms/10.1016/S0140-6736\(20\)30925-9/attachment/1802c2b8-7ccc-467e-b4dd-92f466cf5e15/mmc2e.pdf](https://www.thelancet.com/cms/10.1016/S0140-6736(20)30925-9/attachment/1802c2b8-7ccc-467e-b4dd-92f466cf5e15/mmc2e.pdf). [https://doi.org/10.1016/S0140-6736\(20\)30925-9](https://doi.org/10.1016/S0140-6736(20)30925-9) PMID: 33069326
8. Global Health Observatory Data: causes of child mortality. In: World Health Organization, editor. Geneva2022.
9. Cardoso-Dos-Santos AC, Magalhães VS, Medeiros-de-Souza AC, Bremm JM, Alves RFS, Araujo VEM, et al. International collaboration networks for the surveillance of congenital anomalies: a narrative review. *Epidemiol Serv Saude*. 2020; 29(4):e2020093. Epub 20200729. <https://doi.org/10.5123/s1679-49742020000400003> PMID: 32756830.
10. The Global Health Network. sSCAN: sub-Saharan African Congenital Anomalies Network: TGNH; 2020 [17 December 2021]. Available from: <https://sscan.tghn.org/>.
11. Grimshaw JM, Eccles MP, Lavis JN, Hill SJ, Squires JE. Knowledge translation of research findings. *Implementation science*. 2012; 7(1):1–17. <https://doi.org/10.1186/1748-5908-7-50> PMID: 22651257
12. Arksey H, O'Malley L. Scoping studies: towards a methodological framework. *International journal of social research methodology*. 2005; 8(1):19–32.
13. Tricco AC, Lillie E, Zarin W, O'Brien K, Colquhoun H, Kastner M, et al. A scoping review on the conduct and reporting of scoping reviews. *BMC Med Res Methodol*. 2016; 16:15. <https://doi.org/10.1186/s12874-016-0116-4> PMID: 26857112; PubMed Central PMCID: PMC4746911.
14. Munn Z, Peters MDJ, Stern C, Tufanaru C, McArthur A, Aromataris E. Systematic review or scoping review? Guidance for authors when choosing between a systematic or scoping review approach. *BMC*

- Medical Research Methodology. 2018; 18(1):143. <https://doi.org/10.1186/s12874-018-0611-x> PMID: 30453902
15. Peters M, Godfrey C, Mclerney P, Munn Z, Tricco AC, Khalil H. Scoping Reviews. In: Aromataris E, Munn Z, editors. JBI Reviewers Manual. JBI2020.
  16. Peters M, Godfrey C, Mclerney P, Soares C, Hanan K, Parker D. The Joanna Briggs Institute Reviewers' Manual 2015: Methodology for JBI Scoping Reviews. 2015.
  17. Tricco AC, Lillie E, Zarin W, O'Brien KK, Colquhoun H, Levac D, et al. PRISMA extension for scoping reviews (PRISMA-ScR): checklist and explanation. *Annals of internal medicine*. 2018; 169(7):467–73. <https://doi.org/10.7326/M18-0850> PMID: 30178033
  18. Shaye David A.; Burks Ciersten A; Gadkaree Shekhar K; Ncogoza Isaie; Tuyishimire Gratien; Nya-byenda Victor; et al. Self-compounded Doxycycline Sclerotherapy for the Treatment of Lymphatic Malformations in Low-Resource Settings. *World J.Surg.*2020; 44(11). <https://doi.org/10.1007/s00268-020-05667-z> PMID: 32642795
  19. Ogundoyin,Olakayode Olaolu; Olulana,Dare Isaac; Lawal,Taiwo Akeem. Experience with the management of anorectal malformations in Ibadan, Nigeria. 2021; 38().
  20. Ghabrial Emad; Butow Kurt W.; Olorunju Steve. South African speech-language therapists' opinion of their training in cleft lip and palate and craniofacial deformities. 2020; 67(1). <https://doi.org/10.4102/sajcd.v67i1.695> PMID: 32787416
  21. Elias Hussein E.; Amisi James A. Twin pregnancy in a bicornuate uterus in rural Kenya: A case report for accidental discovery and successful delivery. 2020; 12(1).
  22. Luis Moreno Oliveras; Luis Llacer Ortega,Jose; Andreas Leidinger; Mohamed Ali Haji; Pilar Chisbert Genoves,Maria; Jose Piquer Belloch. Infant hydrocephalus in sub-Saharan Africa: Impact of perioperative care in the Zanzibar archipelago. 2020; 31(5).
  23. Kalangu KazadiK.N.; Esene Ignatius.; Dzowa Maximilian; Musara Aaron; Ntalaja Jeff; Badra Aliou K. Towards zero infection for ventriculoperitoneal shunt insertion in resource-limited settings: a multicenter prospective cohort study. 2020; 36(2). <https://doi.org/10.1007/s00381-019-04357-z> PMID: 31455997
  24. Capela Mariana; Reis Joana; Guedes Raquel. Anal imperforation in a Congo village: a challenge for treatment. 2021; 14(2). 22.
  25. Choi Sugy; Shin Heesu; Heo Jongho; Gedlu Etsegenet; Nega Berhanu; Moges Tamirat; et al. How do caregivers of children with congenital heart diseases access and navigate the healthcare system in Ethiopia? 2021; 21(1). <https://doi.org/10.1186/s12913-021-06083-2> PMID: 33526022
  26. Emeka Chukwubuike,Kevin; Ignatius Ozor;Nnenna Enyi. Prevalence and pattern of birth defects in the two tertiary hospitals in Enugu, South East Nigeria: A hospital-based observational study. 2020; 17(3 & 4).
  27. Diatewa,Benedicte Marebe; Maneh,Nidain; Domingo,Aboubakr Sidik;Gnansa,Koboyo Eosso-Issinam; Ayikoue,Yannick Francis Amah; Balo,Komi Patrice. [Congenital ocular anomalies at the University Hospital Campus in Lome, Togo]. 2021; 38().
  28. Kasanga,Tresor Kibangula; Mujinga,Didier Tshibangu;Zeng,Florent Tshibwid; Banza,Manix Ilunga; Mukakala,Augustin Kibonge; Musapudi,Eric Mbuya; et al. Anorectal malformations: a 6-years review at the University Clinics of Lubumbashi. 2021; 0().
  29. Assefa Desalew; Yitagesu Sintayehu; Nardos Teferi; Firehiwot Amare;Bifitu Geda; Teshager Worku; et al. Cause and predictors of neonatal mortality among neonates admitted to neonatal intensive care units of public hospitals in eastern Ethiopia: a facility-based prospective follow-up study. 2020; 20(1).
  30. Abbas Ali,Mecheala; Abass Shaza K.; Fadol Nasir,Elwalid. A comparative assessment of oral health-related quality of life of children born with orofacial clefts in Sudan and their caregivers'. 2021; 21(1).
  31. Jane Commander,Sarah; Danielle Ellis; Hannah Williamson; Felix Oyania; Comfart Ruhigwa; Martin Situma; et al. Social and financial barriers may contribute to a "hidden mortality" in Uganda for children with congenital anomalies. 2021; 169(2). <https://doi.org/10.1016/j.surg.2020.09.018> PMID: 33097243
  32. Vlok Sucari S. C.;Moore Sam W.;Schubert Pawel T.;Pitcher Richard D. Accuracy of colonic mucosal patterns at contrast enema for diagnosis of Hirschsprung disease. *Pediatr.Radiol.*2020; 50(6). <https://doi.org/10.1007/s00247-020-04631-2> PMID: 32052081
  33. Bafor A.; Chibuzom C. N. Foot and ankle abnormalities among a cohort of Nigerian school children: an epidemiological study. *Int.Orthop.*2020; 44(6). <https://doi.org/10.1007/s00264-020-04568-z> PMID: 32328738
  34. Duncan Henderson; Maxigama Ndossi; Rebeca Majige; Mwanaabas Sued; Hamissi Shabani. Understanding the Mothers of Children with Spina Bifida and Hydrocephalus in Tanzania. 2020; 142(). <https://doi.org/10.1016/j.wneu.2020.06.224> PMID: 32652272

35. Kalisya Luc Malemo; Bake Jacques Fadhili; Elisee Bake; Nyavandu Kavira; Perry Robert; Rothstein David H.; et al. Surgical Repair of Orofacial Clefts in North Kivu Province of Eastern Democratic Republic of Congo (DRC). 2020; 57(11). <https://doi.org/10.1177/1055665620947604> PMID: [32787585](https://pubmed.ncbi.nlm.nih.gov/32787585/)
36. Adekunle Adegbayi Adeola; Adamson Olawale; James Olutayo; Ogunlewe Omobolanle M.; Butali Azeez; Adeyemo Wasiu Lanre. Breastfeeding Practices Among Mothers of Children With Orofacial Clefts in an African Cohort. 2020; 57(8).
37. Oyania Felix; Kotagal Meera; Situma Martin. 15-Year-old with neglected recto-vestibular fistula in western Uganda: a case report. 2021; 0(). <https://doi.org/10.1186/s13256-021-02717-5> PMID: [33632306](https://pubmed.ncbi.nlm.nih.gov/33632306/)
38. Ikenga Chidiebele Samuel; Sahu Balswaroop; Okwulehie Vincent; Umeh Friday. Emergency deep hypothermic circulatory arrest in a 1-year-old undergoing cardiac surgery in a Nigerian hospital— anaesthesia and critical care interventions. 2020; 0().
39. Duru C. O.; Okpokowuruk F. S.; Adesina A. D.; Worgu G. O.; Adeniji F. O.; Chinawa J. M.; et al. Caring for Children with Congenital Heart Diseases: Economic Burden of Pre-Surgical Management on Nigerian Families. *West Afr. J. Med.* 2021; 38(2). PMID: [33641149](https://pubmed.ncbi.nlm.nih.gov/33641149/)
40. Idowu S. O.; Adewole O. A.; Balogun J.; Giwa S. O. Ultrasonographic Volumetric Assessment of Achilles Tendons in Unilateral Congenital Clubfoot in Lagos, Nigeria. *West Afr. J. Med.* 2020; 37(6). PMID: [33185268](https://pubmed.ncbi.nlm.nih.gov/33185268/)
41. Nabatanzi Maureen; Seruwagi Gloria Kimuli; Tushemerirwe Florence Basiimwa; Atuyambe Lynn; Lubogo David. Mine did not breastfeed, mothers' experiences in breastfeeding children aged 0 to 24 months with oral clefts in Uganda. 2021; 21(1).
42. Mubungu Gerrye; Lumaka Aime; Mvuama Nono; Tshika Dahlie; Makay Prince; Tshilobo Prosper Lukusa; Devriendt Koenraad. Morphological characterization of newborns in Kinshasa, DR Congo: Common variants, minor, and major anomalies. 2020; 182(4). <https://doi.org/10.1002/ajmg.a.61477> PMID: [31912658](https://pubmed.ncbi.nlm.nih.gov/31912658/)
43. Nzomiuwu C. L.; Fomete B.; Omisakin O. O. Dental Anomalies Associated with Orofacial Cleft among a Group of Individuals in Northwestern Nigeria. *West Afr. J. Med.* 2021; 38(1). PMID: [33463699](https://pubmed.ncbi.nlm.nih.gov/33463699/)
44. Agot George Nyadimo; Mweu Marshal Mutinda; Wang'ombe Joseph Kibuchi. Prevalence of major external structural birth defects in Kiambu County, Kenya, 2014–2018. 2020; 37(). <https://doi.org/10.11604/pamj.2020.37.187.26289> PMID: [33447342](https://pubmed.ncbi.nlm.nih.gov/33447342/)
45. Mazhani Tiny; Steenhoff Andrew P.; Tefera Endale; David Thuso; Patel Zaakir; Sethomo Warona; et al. Clinical spectrum and prevalence of congenital heart disease in children in Botswana. 2020; 31(5). <https://doi.org/10.5830/CVJA-2020-021> PMID: [32629461](https://pubmed.ncbi.nlm.nih.gov/32629461/)
46. Bruneel Laura; Alighieri Cassandra; D'haeseleer Evelien; Kissel Imke; Adriaansen Anke; Sseremba Daniel; et al. Reliability results of perceptual ratings of resonance, nasal airflow and speech acceptability in patients with cleft palate by Ugandan speech-language pathologists following a two-day workshop. *Int. J. Pediatr. Otorhinolaryngol.* 2020; 136. <https://doi.org/10.1016/j.ijporl.2020.110191> PMID: [32593063](https://pubmed.ncbi.nlm.nih.gov/32593063/)
47. Ujunwa F. A.; Ujuanbi I. S.; Chinawa J. M. Complex congenital heart diseases among children presenting for cardiac surgery in a tertiary health facility in Enugu; South-East Nigeria. A rising trend. 2021; 24(1).
48. Seye Cheikh; Mbaye Pape Alassane; Ndoye Ndeye Aby; Diouf Cheikh; Fall Mbaye; Sagna Alose; et al. Omphalomesenteric fistulas; epidemiological diagnostic and therapeutic features: study of four cases in the Department of Pediatric Surgery at the Aristide Le Dantec University Hospital in Dakar. 2020; 0.
49. Okon, Ubong Akpan; Ibrahim, Baffa Sule; Usman, Rabi; Adedire, Elizabeth; Balogun, Muhammad Shaki; Olayinka, Adebola. Awareness and use of folic acid among women of childbearing age in Benue State, Nigeria. 2020; 37.
50. Ekure Ekanem N; Sokunbi Ogochukwu; Kalu Nnenna; Olusegun-Joseph Akinsanya; Kushimo Oye-wole; Amadi Casmir; et al. Congenital heart disease in school children in Lagos, Nigeria: Prevalence and the diagnostic gap. 2020; 184(1). <https://doi.org/10.1002/ajmg.c.31779> PMID: [32052942](https://pubmed.ncbi.nlm.nih.gov/32052942/)
51. Zimmerman Meghan; Sable Craig. Congenital heart disease in low-and-middle-income countries: Focus on sub-Saharan Africa. 2020; 184(1). <https://doi.org/10.1002/ajmg.c.31769> PMID: [32026623](https://pubmed.ncbi.nlm.nih.gov/32026623/)
52. Ngwanou, Dany Hermann; Ngantchet, Emmanuel; Moyo, Georges Pius Kamsu. Prune-Belly syndrome, a rare case presentation in neonatology: about one case in Yaounde, Cameroon. 2020; 0.
53. Adane Fentahun; Afework Mekbeb; Seyoum Girma; Gebrie Alemu. Prevalence and associated factors of birth defects among newborns in sub-Saharan African countries: a systematic review and meta-analysis. 2020; 36. <https://doi.org/10.11604/pamj.2020.36.19.19411> PMID: [32774596](https://pubmed.ncbi.nlm.nih.gov/32774596/)

54. Wesonga A.; Situma M.; Lakhoo K. Reducing Gastroschisis Mortality: A Quality Improvement Initiative at a Ugandan Pediatric Surgery Unit. *World J.Surg.*2020; 44(5).
55. Namuyonga Judith; Lubega Sulaiman; Aliku Twalib; Omagino John; Sable Craig; Lwabi Peter. Pattern of congenital heart disease among children presenting to the Uganda Heart Institute, Mulago Hospital: a 7-year review. 2020; 20(2).
56. James O.; Erinoso O. A.; Adamson O. O.; Sokunbi O. J.; Agbogidi F. O.; Adekunle A. A.; et al. Risk of congenital cardiovascular anomalies in patients with non-syndromic orofacial cleft: A preliminary case-control study. 2020; 23(11). [https://doi.org/10.4103/njcp.njcp\\_176\\_20](https://doi.org/10.4103/njcp.njcp_176_20) PMID: 33221782
57. Sokunbi Ogochukwu J.; Mgbajah Ogadinma; Olugbemi Augustine; Udom Bassey O.; Idowu Ariyo; Sanusi Michael O. Maintaining paediatric cardiac services during the COVID-19 pandemic in a developing country in sub-Saharan Africa: guidelines for a "scale up" in the face of a global "scale down". *Cardiol.Young*2020; 30(11).
58. Arivoli Muthukurisil; Biswas Arushi; Burroughs Nolan; Wilson Patrick; Salzman Caroline; Kakembo Nasser; et al. Multidisciplinary Development of a Low-Cost Gastroschisis Silo for Use in Sub-Saharan Africa. *J.Surg.Res.*2020; 255. <https://doi.org/10.1016/j.jss.2020.05.037> PMID: 32645490
59. Sap Suzanne Ngo Um; Mbono Betoko, Ritha; Etoa Etoga, Martine; Mure Pierre Yves; Morel Yves; Dahoun Sophie; et al. Observational study of disorders of sex development in Yaounde, Cameroon. 2020; 33(3). <https://doi.org/10.1515/jpem-2019-0458> PMID: 32069241
60. Bagenda Fred; Mulogo Edgar Mugema; Apecu Richard Onyuthi; Kisakye Anette; Opar Benard Toliva. Rubella IgM epidemiology in the pre-rubella vaccination era in Uganda. 2020; 20(1). <https://doi.org/10.1186/s12879-020-4928-9> PMID: 32164592
61. Hunter L. D.; Lloyd G. W.; Monaghan M. J.; Pecoraro A. J. K.; Doubell A. F.; Herbst P. G. Congenital bicuspid aortic valve: Differential prevalence across different South African population groups. 2020; 110(8). <https://doi.org/10.7196/SAMJ.2020.v110i8.14854> PMID: 32880286
62. Machingaidze Pamela Rudo; Buys Heloise; Kilborn Tracy; Muloiwa Rudzani. Clinical use and indications for head computed tomography in children presenting with acute medical illness in a low- and middle-income setting. 2020; 15(9). <https://doi.org/10.1371/journal.pone.0239731> PMID: 32986760
63. Abich Yohannes; Mihiret Tewodros; Yihunie Akalu; Temesgen; Gashaw Moges; Janakiraman Balamurugan. Flatfoot and associated factors among Ethiopian school children aged 11 to 15 years: A school-based study. 2020; 15(8).
64. Michael Afieharo Igbibia; Ademola Samuel Adesina; Olawoye Olayinka Adebani; Iyun Ayodele Olukayode; Oluwatosin Odunayo Moronfoluwa. Pattern of congenital hand anomalies at a tertiary plastic surgery service in South-Western Nigeria: A 10-year, cross-sectional retrospective review. *Niger.Post-grad.Med.J.*2020; 27(3).
65. Sulaiman B.; Shehu C. E.; Panti A. A.; Saidu S. A.; Onankpa B.; Ekele B. A. Prevalence and outcome of increased nuchal translucency in usmanu danfodiyo university teaching hospital, Sokoto, Nigeria: A cohort study. 2020; 23(6). [https://doi.org/10.4103/njcp.njcp\\_191\\_19](https://doi.org/10.4103/njcp.njcp_191_19) PMID: 32525124
66. Tamatey M. N.; Tettey M. M.; Edwin F.; Aniteye E. A.; Entsua-Mensah K.; Gyan B.; et al. Twenty Years of Repair of Ventricular Septal Defects in Ghana. *West Afr.J.Med.*2020; 37(3).
67. Van Brusselen Daan; Kayembe-Kitenge Tony; Mbuyi-Musanazayi Sebastien; Lubala Kasole, Toni; Kabamba Ngombe, Leon; Musa Obadia, Paul; et al. Metal mining and birth defects: a case-control study in Lubumbashi, Democratic Republic of the Congo. 2020; 4(4). [https://doi.org/10.1016/S2542-5196\(20\)30059-0](https://doi.org/10.1016/S2542-5196(20)30059-0) PMID: 32353296
68. Bot Gyang Markus; Ismail Nasiru J.; Mahmud Muhammad Raji; Hassan Ismail; Lasseini Ali; Shilong Danaan J.; et al. Giant Encephalocele in Sokoto, Nigeria: A 5-Year Review of Operated Cases. 2020; 139. <https://doi.org/10.1016/j.wneu.2020.03.061> PMID: 32201291
69. Desire Alumeti Munyali; Buhendwa Cikwanine; Cesaire Tetsatsi Momo Aime; Prisca Kavira Ise Somo; Levi Luhiriri Ndanda; David Nanga Batende; et al. Epidemiology, Diagnosis and Therapeutic Approaches of Cryptorchidism at the Panzi General Hospital, DR Congo: A 5-year Retrospective Study. 2020; 30(1).
70. Mekonnen Alemayehu Gonie; Hordofa Alemu Girma; Kitila Tamiru Tesfaye; Sav Adem. Modifiable risk factors of congenital malformations in bale zone hospitals, Southeast Ethiopia: an unmatched case-control study. 2020; 20(1). <https://doi.org/10.1186/s12884-020-2827-0> PMID: 32106830
71. Nyanza Elias C.; Dewey Deborah; Manyama Mange; Martin Jonathan W.; Hatfield Jennifer; Bernier Francois P. Maternal exposure to arsenic and mercury and associated risk of adverse birth outcomes in small-scale gold mining communities in Northern Tanzania. *Environ.Int.*2020; 137. <https://doi.org/10.1016/j.envint.2019.105450> PMID: 32014788
72. Grabski David F.; Kakembo Nasser; Situma Martin; Cheung Maija; Shikanda Anne; Okello Innocent; et al. Burden of emergency pediatric surgical procedures on surgical capacity in Uganda: a new metric

- for health system performance. 2020; 167(3). <https://doi.org/10.1016/j.surg.2019.12.002> PMID: 31973913
73. Duke Roseline; Torty Chimaeze; Nwachukwu Kennedy; Ameh Soter; Kim Min; Eneli Nnena; et al. Clinical features and aetiology of cerebral palsy in children from Cross River State, Nigeria. *Arch.Dis. Child.*2020; 105(7). <https://doi.org/10.1136/archdischild-2019-317932> PMID: 31959596
  74. Schoonraad Leilah; Slogrove Amy; Engelbrecht Arnold; Urban Michael F. A 5-Year Retrospective Review of the Health Supervision Received by Children with Down Syndrome at a South African Regional Hospital. *J.Trop.Pediatr.*2020; 66(4).
  75. Okoye L. O.; Onah I. I.; Ekwueme O. C.; Agu K. A. Pattern of malocclusion and caries experience in unrepaired cleft lip and palate patients in Enugu. 2020; 23(1). [https://doi.org/10.4103/njcp.njcp\\_249\\_19](https://doi.org/10.4103/njcp.njcp_249_19) PMID: 31929208
  76. Pepeta Lungile; Greyling Adele; Nxele Mahlubandile Fintan; Makrexeni Zongezile; Jiyana Samkelo. Ductal closure in infants under 6 kg including premature infants using Amplatzer™ duct occluder type two additional sizes: a single-centre experience in South Africa. 2020; 31(1). <https://doi.org/10.5830/CVJA-2019-044> PMID: 31469384
  77. Dugdale Caitlin M.; Ciaranello Andrea L.; Bekker Linda-Gail; Stern Madeline E.; Myer Landon; Wood Robin; et al. Risks and Benefits of Dolutegravir- and Efavirenz-Based Strategies for South African Women With HIV of Child-Bearing Potential: A Modeling Study. *Ann.Intern.Med.*2019; 170(9). <https://doi.org/10.7326/M18-3358> PMID: 30934067
  78. Hill Sarah C.; Vasconcelos Jocelyne; Neto Zoraima; Jandondo Domingos; Ze-Ze Libia; Aguiar Renato Santana; et al. Emergence of the Asian lineage of Zika virus in Angola: an outbreak investigation. 2019; 19(10). [https://doi.org/10.1016/S1473-3099\(19\)30293-2](https://doi.org/10.1016/S1473-3099(19)30293-2) PMID: 31559967
  79. Ekure Ekanem N.; Amadi Casmir; Sokunbi Ogochukwu; Kalu Nnenna; Olusegun-Joseph Akinsanya; Kushimo Oyewole; et al. Echocardiographic screening of 4107 Nigerian school children for rheumatic heart disease. 2019; 24(6). <https://doi.org/10.1111/tmi.13235> PMID: 30938017
  80. Ramdial Shaal; Madaree Anil. The spectrum of intraoral bacteria seen in patients with cleft palates in an African setting. 2019; 8(4).
  81. Woldmichael Kalkidan Gebremeskel; Akililu Tamirat Moges. Mission-based cardiac surgery and catheter treatment of coarctation of aorta in the young and older children: a facility based review of cases in Addis Ababa. 2019; 34(). <https://doi.org/10.11604/pamj.2019.34.160.19406> PMID: 32153700
  82. Itiola Adejumoke Y.; Animasahun Barakat A.; Njokanma Olisamedua F. Serum Iron Status of Children with Cyanotic Congenital Heart Disease in Lagos, Nigeria. 2019; 19(4). <https://doi.org/10.18295/squmj.2019.19.04.010> PMID: 31897318
  83. Zuechner Antke; Mhada Tumaini; Majani Naizihijwa G.; Sharau Godwin G.; Mahalu William; Freund Matthias W. Spectrum of heart diseases in children presenting to a paediatric cardiac echocardiography clinic in the Lake Zone of Tanzania: a 7 years overview. 2019; 19(1).
  84. Kamla Igor; Kamgaing Nelly; Billong Serge; Tochie Joel Noutakdie; Tolefac Paul; de Paul Djientcheu, Vincent. Antenatal and postnatal diagnoses of visible congenital malformations in a sub-Saharan African setting: a prospective multicenter cohort study. 2019; 19(1).
  85. Disu E. A.; Kehinde O. A.; Anga A. L.; Ubuane P. O.; Itiola A.; Akinola I. J.; et al. Congenital pulmonary airway malformation: A case report of a rare cause of neonatal respiratory distress and review of the literature. 2019; 22(11). [https://doi.org/10.4103/njcp.njcp\\_20\\_19](https://doi.org/10.4103/njcp.njcp_20_19) PMID: 31719287
  86. Mumpe-Mwanja Daniel; Barlow-Mosha Linda; Williamson Dhelia; Valencia Diana; Serunjogi Robert; Kakande Ayoub; et al. A hospital-based birth defects surveillance system in Kampala, Uganda. 2019; 19(1). <https://doi.org/10.1186/s12884-019-2542-x> PMID: 31640605
  87. Krzesinski E. I.; Geerts L.; Urban M. F. Neural tube defect diagnosis and outcomes at a tertiary South African hospital with intensive case ascertainment. 2019; 109(9).
  88. Oluwafemi Rosena Olubanke; Abiodun Moses Temidayo. Incidence, spectrum and outcome of congenital anomalies seen in a neonatal intensive care unit in Southern Nigeria. *Niger.Postgrad.Med.J.*2019; 26(4).
  89. Tefera Endale; Gedlu Etsegenet; Nega Berhanu; Tadesse Birkneh T.; Chanie Yikal; Dawoud Ali; Moges Fekadesilassie H.; et al. Factors associated with perioperative mortality in children and adolescents operated for tetralogy of Fallot: A sub-Saharan experience. *J.Card.Surg.*2019; 34(12). <https://doi.org/10.1111/jocs.14270> PMID: 31600427
  90. Worede Daniel Tarekegn; Dagnaw Gizachew Worku. Determinants of stillbirth in Felege-Hiwot comprehensive specialized referral hospital, North-west, Ethiopia, 2019. 2019; 12(1). <https://doi.org/10.1186/s13104-019-4621-5> PMID: 31521188

91. Lasebikan O. A.; Anikwe I. A.; Onyemaechi N. O.; Chukwujindu E. D.; Nwadinigwe C. U.; Omoke N. I. Ponseti clubfoot management method: Initial experience with 273 clubfeet treated in a clubfoot clinic of a Nigerian regional orthopedic hospital. 2019; 22(9).
92. Massenga Alicia; Chibwae Alfred; Nuri Aloyce A.; Bugimbi Merchades; Munisi Yasin K.; Mfinanga Ramadhani; et al. Indications for and complications of intestinal stomas in the children and adults at a tertiary care hospital in a resource-limited setting: a Tanzanian experience. 2019; 19(1).
93. Saso Anja; Dowsing Benjamin; Forrest Karen; Glover Mary. Recognition and management of congenital ichthyosis in a low-income setting. 2019; 12(8).
94. Dixon Meredith; Kancharla Vijaya; Magana Tony; Mulugeta Afework; Oakley Godfrey P Jr. High potential for reducing folic acid-preventable spina bifida and anencephaly, and related stillbirth and child mortality, in Ethiopia. 2019; 111(19). <https://doi.org/10.1002/bdr2.1584> PMID: 31424635
95. Kayembe-Kitenge Tony; Kasole Lubala, Toni; Musa Obadia, Paul; Katoto Chimusa, Patrick; Katshiez Nawej, Cyrille; Banza Lubaba Nkulu, Celestin; et al. Holoprosencephaly: A case series from an area with high mining-related pollution. 2019; 0. <https://doi.org/10.1002/bdr2.1583> PMID: 31419067
96. Tsehay Binalfew; Shitie Desalegn; Lake Akilog; Abebaw Erimiyas; Taye Amisalu; Essa Enatinesh. Determinants and seasonality of major structural birth defects among newborns delivered at primary and referral hospital of East and West Gojjam zones, Northwest Ethiopia 2017–2018: case-control study. 2019; 12(1). <https://doi.org/10.1186/s13104-019-4541-4> PMID: 31399144
97. Sanzarello Ilaria; Nanni Matteo; Perna Fabrizio; Traina Francesco; Faldini Cesare. One-stage release by double surgical approach for neglected congenital vertical talus: results in a series of walking children in Tanzania. 2019; 28(6).
98. Bekele Konjit K.; Ekanem Peter E.; Meberate Berhanu. Anatomical patterns of cleft lip and palate deformities among neonates in Mekelle, Tigray, Ethiopia; implication of environmental impact. 2019; 19(1). <https://doi.org/10.1186/s12887-019-1624-2> PMID: 31340768
99. Zash Rebecca, Holmes Lewis, Diseko Modiegi, Jacobson Denise L., Brummel Sean, et al. "Neural-tube defects and antiretroviral treatment regimens in Botswana." *New England Journal of Medicine* 381, no. 9 (2019): 827–840. <https://doi.org/10.1056/NEJMoa1905230> PMID: 31329379
100. Raesima Mmakgomo M., Ogbuabo Chibuike M., Thomas Vasavi, Forhan Sara E., Gokatweng Gadzikani, et al. "Dolutegravir use at conception—additional surveillance data from Botswana." *New England Journal of Medicine* 381, no. 9 (2019): 885–887. <https://doi.org/10.1056/NEJMc1908155> PMID: 31329378
101. Cheung Maija, Kakembo Nasser, Rizgar Nensi, Grabski David, Ullrich Sarah, et al. "Epidemiology and mortality of pediatric surgical conditions: insights from a tertiary center in Uganda." *Pediatric Surgery International* 35 (2019): 1279–1289.
102. Michael Afieharo Igbibia, and Olumide Olatokunbo Jarrett. "Parental views on plastic surgery for Down syndrome: an African perspective." *Pan African Medical Journal* 32, no. 1 (2019). <https://doi.org/10.11604/pamj.2019.32.207.18316> PMID: 31312319
103. Awa Hubert Désiré Mbassi, Rose Mbédé Nga Mvondo, Séraphin Nguéfack, Charles Bengondo Messanga, and Paul Olivier Koki Ndombo. "Rare diseases and their clinical oral manifestations in two Hospitals in Yaoundé." *The Pan African Medical Journal* 32 (2019): 195–195.
104. Ayehualem Sileshi, Asmare Yared, Abrha Mueez, and Muche Abebe. "Prediction of number of casts and need of tenotomy using Pirani score in the management of clubfoot." *Journal of Craniofacial Surgery* 30, no. 5 (2019): e477–e481. <https://doi.org/10.1097/SCS.0000000000005571> PMID: 31299821
105. Taye Molla, Afework Mekbebe, Fantaye Wondwossen, Diro Ermias, and Worku Alemayehu. "Congenital anomalies prevalence in Addis Ababa and the Amhara region, Ethiopia: a descriptive cross-sectional study." *BMC pediatrics* 19 (2019): 1–11. <https://doi.org/10.1186/s12887-019-1596-2> PMID: 31296186
106. Anegbe Ambrose O., Shokunbi M. Temitayo, Oyemolade Toyin A., and Badejo Oluwakemi A. "Intracranial infection in patients with myelomeningocele: profile and risk factors." *Child's Nervous System* 35 (2019): 2205–2210. <https://doi.org/10.1007/s00381-019-04219-8> PMID: 31289854
107. Enslin J. M. N., Fieggen A. G., and Figaji A. "Chiari 1 malformation management: the Red Cross War Memorial Hospital approach." *Child's Nervous System* 35 (2019): 1881–1884. <https://doi.org/10.1007/s00381-019-04281-2> PMID: 31270574
108. Hlongwa P., Dandajena T. C., and Rispel L. C. "Comparative analysis of healthcare provision to individuals with cleft lip and/or palate at specialised academic centres in South Africa." *South African Medical Journal* 109, no. 6 (2019): 426–430.
109. Bruneel Laura, Alighieri Cassandra, Bettens Kim, Musasizi Duncan, Ojok Isaac, et al. "Assessing health-related quality of life in patients with cleft palate in resource-limited countries: a preliminary evaluation of the VELO questionnaire in Uganda." *International journal of pediatric otorhinolaryngology* 124 (2019): 39–46. <https://doi.org/10.1016/j.ijporl.2019.05.018> PMID: 31158570

110. Ekenze Sebastian. "Congenital obstructive bowel anomalies presenting after neonatal age." *Malawi Medical Journal* 31, no. 1 (2019): 77–81. <https://doi.org/10.4314/mmj.v31i1.13> PMID: 31143401
111. Alighieri Cassandra, Bettens Kim, Bruneel Laura, Vandormael Charlotte, Musasizi Duncan, et al. "Intensive speech therapy in Ugandan patients with cleft (lip and) palate: A pilot-study assessing long-term effectiveness." *International journal of pediatric otorhinolaryngology* 123 (2019): 156–167. <https://doi.org/10.1016/j.ijporl.2019.05.007> PMID: 31112839
112. Purcell Laura; Ngwira Natasha; Gallaher Jared; Cairns Bruce; Charles Anthony. Characteristics and outcomes in paediatric patients presenting with congenital colorectal diseases in sub-Saharan Africa. *Trop.Doct.*2019; 49(4). <https://doi.org/10.1177/0049475519851010> PMID: 31109246
113. Ameyaw Emmanuel; Asafo-Agyei Serwah Bonsu; Hughes Ieuan A.; Zacharin Margaret; Chanoine Jean-Pierre. Incidence of disorders of sexual development in neonates in Ghana: prospective study. *Arch.Dis.Child.*2019; 104(7). <https://doi.org/10.1136/archdischild-2019-316986> PMID: 31097528
114. Kontchou Nelly-Ange T., Andrew W. McCrary, and Kevin A. Schulman. "Workforce cost model for expanding congenital and rheumatic heart disease services in Kenya." *World Journal for Pediatric and Congenital Heart Surgery* 10, no. 3 (2019): 321–327. <https://doi.org/10.1177/2150135119837201> PMID: 31084310
115. Hlongwa Phumzile, Levin Jonathan, and Rispel Laetitia C. "Epidemiology and clinical profile of individuals with cleft lip and palate utilising specialised academic treatment centres in South Africa." *PloS one* 14, no. 5 (2019): e0215931. <https://doi.org/10.1371/journal.pone.0215931> PMID: 31071123
116. Brooks Daniel, Asta Katharine, Sturza Julie, Kebede Birhanu, Bekele Delayehu, et al. "Patient preferences for prenatal testing and termination of pregnancy for congenital anomalies and genetic diseases in Ethiopia." *Prenatal Diagnosis* 39, no. 8 (2019): 595–602. <https://doi.org/10.1002/pd.5472> PMID: 31063215
117. Muntha Ahmed, and Moges Tamirat. "Congenital cardiovascular anomalies among cases of Down syndrome: A hospital based review of cases in TikurAnbessa specialized hospital, Ethiopia." *Ethiopian Journal of Health Sciences* 29, no. 2 (2019). <https://doi.org/10.4314/ejhs.v29i2.3> PMID: 31011264
118. van der Merwe Ernst B., Bhika Raquel E., and Meyer David. "Glaucoma in phacomatosis pigmentovascularis in a young African adolescent boy: a case report." *Journal of Glaucoma* 28, no. 7 (2019): e124–e125. <https://doi.org/10.1097/IJG.0000000000001264> PMID: 30994485
119. Ajao Akinlabi E., and Adeoye Ikeola A. "Prevalence, risk factors and outcome of congenital anomalies among neonatal admissions in OGBOMOSO, Nigeria." *BMC pediatrics* 19, no. 1 (2019): 1–10.
120. Ekenze S. O., Chikani U. N., Ezomike U. O., and Okafor D. C. "Outcome of feminizing genital reconstruction in female sex assigned disorder of sex development in a low-income country." *Journal of Pediatric Urology* 15, no. 3 (2019): 244–250. <https://doi.org/10.1016/j.jpurol.2019.02.021> PMID: 30926253
121. Guneren Ethem, Ture Nurullah, Furkan Erol Karabekmez, and Khalique Zahir. "Contribution of the Use of a Pen-Type Endoscope to Evaluate and Treat Ears Simultaneously During Cleft Palate Surgery in Late Presented Cases." *Journal of Craniofacial Surgery* 30, no. 4 (2019): 1211–1213. <https://doi.org/10.1097/SCS.0000000000005272> PMID: 30865113
122. Manuel Valdano, Morais Humberto, Aida LR Turquetto, Gade Miguel, Miana Leonardo A., et al. "Single ventricle palliation in a developing sub-Saharan African country: what should be improved?." *World Journal for Pediatric and Congenital Heart Surgery* 10, no. 2 (2019): 164–170. <https://doi.org/10.1177/2150135118822671> PMID: 30841832
123. Ofor Ifeanyichukwu, Awodele Olufunsho, and Oshikoya Kazeem A. "Drug-related teratogenic and pathologic causes of birth defects in a tertiary hospital in Southwestern Nigeria." *Pharmacology Research & Perspectives* 7, no. 1 (2019): e00452.
124. Welderufael Abadi Leul, Birhane Alem Berihu Yibrah Berhe, Magana Tony, Asfaw Selemawit, et al. "Nutritional status among women whose pregnancy outcome was afflicted with neural tube defects in Tigray region of Ethiopia." *Brain and Development* 41, no. 5 (2019): 406–412. <https://doi.org/10.1016/j.braindev.2018.12.005> PMID: 30651190
125. Edetanlen Ekaniyere Benlance, and Birch Dauda Saheeb. "Otitis media with effusion in Nigerian children with cleft palate: incidence and risk factors." *British Journal of Oral and Maxillofacial Surgery* 57, no. 1 (2019): 36–40. <https://doi.org/10.1016/j.bjoms.2018.11.015> PMID: 30598317
126. Cilliers Antoinette, and Beringer Nadia. "A retrospective review of right-sided hearts at a South African tertiary hospital." *Cardiovascular Journal of Africa* 30, no. 1 (2019): 5–8. <https://doi.org/10.5830/CVJA-2018-051> PMID: 30462143
127. Leidinger Andreas, Piquer Jose, Kim Eliana E., Nahonda Hadia, Qureshi Mahmood M., et al. "Experience in the early surgical management of myelomeningocele in Zanzibar." *World neurosurgery* 121 (2019): e493–e499. <https://doi.org/10.1016/j.wneu.2018.09.145> PMID: 30268549



128. Usman Hadiza Abdullahi, Bala Mohammed Audu Mohammed Bukar, and Mayun Ahmed A. "Ovotestis at 18 years: an accidental discovery in an internally displaced persons' camp in North-Eastern Nigeria." *Journal of Obstetrics and Gynaecology* 39, no. 2 (2019): 281–283. <https://doi.org/10.1080/01443615.2018.1468739> PMID: 30246577
129. Motaze Nkengafac Villyen, Manamela Jack, Smit Sheilagh, Rabie Helena, Harper Kim, et al. "Congenital rubella syndrome surveillance in South Africa using a sentinel site approach: a cross-sectional study." *Clinical Infectious Diseases* 68, no. 10 (2019): 1658–1664. <https://doi.org/10.1093/cid/ciy758> PMID: 30203002
130. Kayima Peter, Kitya David, Punchak Maria, Anderson Geoffrey A., and Situma Martin. "Patterns and treatment outcomes of anorectal malformations in Mbarara Regional Referral Hospital, Uganda." *Journal of Pediatric Surgery* 54, no. 4 (2019): 838–844. <https://doi.org/10.1016/j.jpedsurg.2018.07.019> PMID: 30153942
131. Nasir Abdulrasheed A., Lukman O. Abdur-Rahman, Omotayo O. Adesiyun, Kayode T. Bamigbola, Majeed B. Adegboye, et al. "Analysis of presentations and outcomes of care of children with disorders of sexual development in a Nigerian hospital." *Journal of Pediatric and Adolescent Gynecology* 32, no. 1 (2019): 21–26. <https://doi.org/10.1016/j.jpag.2018.08.005> PMID: 30149125
132. Berihu Birhane Alem, Abadi Leul Welderufael Yibrah Berhe, Magana Tony, Mulugeta Afework, et al. "Maternal risk factors associated with neural tube defects in Tigray regional state of Ethiopia." *Brain and Development* 41, no. 1 (2019): 11–18. <https://doi.org/10.1016/j.braindev.2018.07.013> PMID: 30075882
133. Bello Seidu A., Allwell Brown Ibikari Ifeoluwa Oketade, and Balogun Saliu A. "Atypical facial clefts from Northcentral Nigeria, Review of 36 cases." *The Cleft Palate-Craniofacial Journal* 56, no. 4 (2019): 514–520. <https://doi.org/10.1177/1055665618790884> PMID: 30045630
134. Sims-Williams Helen J., Hugh P. Sims-Williams, Edith Mbabazi Kabachelor, Joshua Magombe, and Benjamin C. Warf. "Children with spina bifida in Eastern Uganda report a reasonable quality of life relative to their healthy school-attending peers." *Archives of Disease in Childhood* 104, no. 1 (2019): 101–102. <https://doi.org/10.1136/archdischild-2018-315044> PMID: 29748330
135. Yifeyeh Abiboye C., Duduyemi Babatunde M., Enimil Anthony, Amoah Michael, and Nimako Boateng. "Malformations: A 5-year review of the presentation and management in a Teaching Hospital in Ghana." *African Journal of Paediatric Surgery: AJPS* 15, no. 2 (2018): 118. [https://doi.org/10.4103/ajps.AJPS\\_10\\_18](https://doi.org/10.4103/ajps.AJPS_10_18) PMID: 31290478
136. Sholadoye Tunde Talib, Philip Mari Mshelbwala, and Emmanuel Adoyi Ameh. "Presentation and outcome of treatment of jejunoileal atresia in Nigeria." *African journal of paediatric surgery: AJPS* 15, no. 2 (2018): 84. [https://doi.org/10.4103/ajps.AJPS\\_120\\_16](https://doi.org/10.4103/ajps.AJPS_120_16) PMID: 31290469
137. Basse Idrissa, Amadou Lamine Fall Ndiogou Seck, Boiro Djiril, Ba Aïssatou, et al. "Les communications interauriculaires chez l'enfant: Diagnostic et prise en charge à propos de 49 cas aux CHU pédiatriques de Dakar." *The Pan African Medical Journal* 30 (2018).
138. Mammo Tihitena Negussie, Negash Samuel A., Negussie Teamir, Getachew Hanna, Dejene Belachew, et al. "Hypospadias repair in Ethiopia: A five year review." *Ethiopian journal of health sciences* 28, no. 6 (2018).
139. Godfrey Evance K., Furumbe Evelyne G., Faustine Flora, and Naburi Helga. "Collodion baby treated at a tertiary hospital in Tanzania: a case report." *Journal of medical case reports* 12, no. 1 (2018): 1–5.
140. Smythe Tracey, Gova Maxman, Muzarurwi Rumbidzai, Foster Allen, and Lavy Christopher. "A comparison of outcome measures used to report clubfoot treatment with the Ponseti method: results from a cohort in Harare, Zimbabwe." *BMC musculoskeletal disorders* 19, no. 1 (2018): 1–8.
141. Akanni D., Savi De Tove K. M., Yekpe-Ahouansou P., Biaou O., and Boco V. "Vein of Galen aneurysmal malformation in a Neonate: a case report." *Le Mali Medical* 33, no. 2 (2018): 23–25.
142. Sow D. S., Bah M., Traoré D., Dante M. L., Mariko M., Traoré B., N'Diaye H. D., Doumbia N., and Sidibé A. T. "Turner syndrome in the hôpital du Mali, a case." *Le Mali Medical* 33, no. 2 (2018): 21–22.
143. Amadou I., Coulibaly Y., MT Coulibaly MO Coulibaly B. Traoré M. Keita, et al. "Pathologies of the Peritoneo-Vaginal Canal in Pediatric Surgery at CHU Gabriel Toure." *Mali Medical* 33, no. 2 (2018).
144. Bolaji Olufunke, Erinomo Olagoke, Adebara Olufunmilayo, Okolugbo Julia, Onumajuru Bartholomew, et al. "Autosomal recessive polycystic kidney disease (ARPKD) in a Nigerian newborn: a case report." *Pan African Medical Journal* 30, no. 1 (2018).
145. Wondimeneh Yitayih, Tiruneh Moges, Ferede Getachew, Deneke Kassahun, Admassu Fisseha, et al. "Hospital based surveillance of congenital rubella syndrome cases in the pre-vaccine era in Amhara Regional State, Ethiopia: A base line information for the country." *PLoS One* 13, no. 11 (2018): e0207095. <https://doi.org/10.1371/journal.pone.0207095> PMID: 30419036

146. Xu Linda W., Vaca Silvia D., He Joy Q., Nalwanga Juliet, Muhumuza Christine, et al. "Neural tube defects in Uganda: follow-up outcomes from a national referral hospital." *Neurosurgical Focus* 45, no. 4 (2018): E9. <https://doi.org/10.3171/2018.7.FOCUS18280> PMID: 30269577
147. Folayan Morenike Oluwatoyin, Nneka Maureen Chukwumah Bamidele Olubukola Popoola, Dada Oluwaseyi Temilola Nneka Kate Onyejaka, et al. "Developmental defects of the enamel and its impact on the oral health quality of life of children resident in Southwest Nigeria." *BMC oral health* 18, no. 1 (2018): 1–10.
148. Adams Paul Ernest, Matthew Francis Chersich, and Antoinette Cilliers. "Transcatheter closure of the patent ductus arteriosus at a public sector hospital in Soweto, South Africa: A review of patient outcomes over 15 years." *Cardiovascular Journal of Africa* 29, no. 4 (2018): 246–251.
149. Van Zyl H., and Levitt N. S. "Pregnancy outcome in patients with pregestational and gestational diabetes attending Groote Schuur Hospital, Cape Town, South Africa." *South African Medical Journal* 108, no. 9 (2018): 772–776. <https://doi.org/10.7196/SAMJ.2018.v108i9.12992> PMID: 30182903
150. Teklay Girmay, Teshale Tsega, Tasew Hagos, Mariye Teklewoini, Berihu Hagos, et al. "Risk factors of preterm birth among mothers who gave birth in public hospitals of central zone, Tigray, Ethiopia: unmatched case–control study 2017/2018." *BMC research notes* 11 (2018): 1–7.
151. Folayan Morenike Oluwatoyin, Titus Ayodeji Oyedele, and Elizabeth Oziegbe. "Time expended on managing molar incisor hypomineralization in a pediatric dental clinic in Nigeria." *Brazilian oral research* 32 (2018).
152. Uche Enoch O., Mezue Wilfred C., Onyia Ephraim E., Iloabachie Izuchukwu, Okorie Chukwuemeka, et al. "The ebb and flow of neurosurgery in a re-emerging sub-Saharan center. Lessons from 1025 consecutive operated cases and progress models. A prospective observational cohort study." *World Neurosurgery* 120 (2018): e80–e87. <https://doi.org/10.1016/j.wneu.2018.07.165> PMID: 30071336
153. Sassetti Madalena, Líbia Zé-Zé João Franco, José da Cunha António Gomes, et al. "First case of confirmed congenital Zika syndrome in continental Africa." *Transactions of The Royal Society of Tropical Medicine and Hygiene* 112, no. 10 (2018): 458–462.
154. Smythe Tracey, Le Grace, Owen Rosalind, Ayana Birhanu, Hansen Linda, et al. "The development of a training course for clubfoot treatment in Africa: learning points for course development." *BMC Medical Education* 18, no. 1 (2018): 1–12.
155. Leidinger Andreas, Piquer Jose, Kim Eliana E., Nahonda Hadia, Qureshi Mahmood M., et al. "Treating pediatric hydrocephalus at the Neurosurgery Education and Development Institute: the reality in the Zanzibar Archipelago, Tanzania." *World Neurosurgery* 117 (2018): e450–e456. <https://doi.org/10.1016/j.wneu.2018.06.050> PMID: 29920393
156. Katusabe Josephine Linda, Hodges Andrew, George William Galiwango, and Edgar M. Mulogo. "Challenges to achieving low palatal fistula rates following primary cleft palate repair: experience of an institution in Uganda." *BMC research notes* 11 (2018): 1–6. <https://doi.org/10.1186/s13104-018-3459-6> PMID: 29880044
157. Turner James, Quiney Freddie, Cashman John, and Lavy Chris. "The effectiveness of sustainable serial casting for clubfoot deformity in a low resource setting." *Malawi Medical Journal* 30, no. 1 (2018): 37–39.
158. Uche Enoch Ogbonnaya, Okorie Chukwuemeka, Iloabachie Izuchukwu, Amuta Dubem S., and Uche Nkechinyere J. "Endoscopic third ventriculostomy (ETV) and ventriculoperitoneal shunt (VPS) in non-communicating hydrocephalus (NCH): comparison of outcome profiles in Nigerian children." *Child's Nervous System* 34 (2018): 1683–1689. <https://doi.org/10.1007/s00381-018-3848-0> PMID: 29860541
159. Mehta U., Heekes A., Kalk E., and Boule A. "Assessing the value of Western Cape Provincial Government health administrative data and electronic pharmacy records in ascertaining medicine use during pregnancy." *South African Medical Journal* 108, no. 5 (2018): 439–443. <https://doi.org/10.7196/SAMJ.2018.v108i5.12879> PMID: 29843860
160. Mbuyi-Musanzayi Sébastien, Kayembe Tony J., Kashal Marc K., Lukusa Prosper T., Kalenga Prosper M., et al. "Non-syndromic cleft lip and/or cleft palate: Epidemiology and risk factors in Lubumbashi (DR Congo), a case-control study." *Journal of Cranio-Maxillofacial Surgery* 46, no. 7 (2018): 1051–1058. <https://doi.org/10.1016/j.jcms.2018.05.006> PMID: 29802056
161. Onyambu Callen Kwamboka, and Norah Mukiri Tharamba. "Screening for congenital fetal anomalies in low risk pregnancy: the Kenyatta National Hospital experience." *BMC pregnancy and childbirth* 18 (2018): 1–9.
162. Smythe Tracey, Mudariki Debra, Foster Allen, and Lavy Christopher. "Indicators to assess the functionality of clubfoot clinics in low-resource settings: a Delphi consensus approach and pilot study." *International Health* 10, no. 5 (2018): 340–348. <https://doi.org/10.1093/inthealth/ihy033> PMID: 29788430

163. Akinmoladun J. A., Ogbole G. I., and Oluwasola T. A. O. "Pattern and outcome of prenatally diagnosed major congenital anomalies at a Nigerian Tertiary Hospital." *Nigerian Journal of Clinical Practice* 21, no. 5 (2018): 560–565. [https://doi.org/10.4103/njcp.njcp\\_210\\_17](https://doi.org/10.4103/njcp.njcp_210_17) PMID: 29735854
164. Taye Molla, Afework Mekbebe, Fantaye Wondwossen, Diro Ermias, and Worku Alemayehu. "Factors associated with congenital anomalies in Addis Ababa and the Amhara Region, Ethiopia: a case-control study." *BMC pediatrics* 18 (2018): 1–11.
165. Rosenstjerne Maiken Worsøe, Frederik Schaltz-Buchholzer Fernanda Bruzadelli, Asson Có Plácido Cardoso, et al. "Zika virus IgG in infants with microcephaly, Guinea-Bissau, 2016." *Emerging Infectious Diseases* 24, no. 5 (2018): 948. <https://doi.org/10.3201/eid2405.180153> PMID: 29664391
166. Hlongwa Phumzile, and Rispel Laetitia C. "“People look and ask lots of questions”: caregivers’ perceptions of healthcare provision and support for children born with cleft lip and palate." *BMC Public Health* 18, no. 1 (2018): 1–10. <https://doi.org/10.1186/s12889-018-5421-x> PMID: 29661170
167. Bannink Femke, Idro Richard, and Geert Van Hove. "Health related quality of life in children with spina bifida in Uganda." *Disability and Health Journal* 11, no. 4 (2018): 650–654. <https://doi.org/10.1016/j.dhjo.2018.03.008> PMID: 29636237
168. Mekonnen Temesgen. "Tail-like congenital duplication of lower extremity (extra leg or vestigial parasitic twin)." *Ethiopian Journal of Health Sciences* 28, no. 1 (2018): 103–107. <https://doi.org/10.4314/ejhs.v28i1.14> PMID: 29622914
169. Compaoré Adélaïde, Gies Sabine, Brabin Bernard, Tinto Halidou, and Brabin Loretta. "Community approval required for periconceptional adolescent adherence to weekly iron and/or folic acid supplementation: a qualitative study in rural Burkina Faso." *Reproductive health* 15, no. 1 (2018): 1–8.
170. Gowans Lord Jephthah Joojo, Oseni Ganiyu, Mossey Peter A., Wasiu Lanre Adeyemo Mekonen A. Eshete, et al. "Novel GREM1 variations in sub-Saharan African patients with cleft lip and/or cleft palate." *The Cleft Palate-Craniofacial Journal* 55, no. 5 (2018): 736–742. <https://doi.org/10.1177/1055665618754948> PMID: 29489415
171. Solarin Adaobi U., Disu Elizabeth A., Gbelee Henry O., Animasahaun Adeola B., Aremu Oluwatosin E., et al. "Three cases of prune belly syndrome at the Lagos State University Teaching Hospital, Ikeja." *Saudi Journal of Kidney Diseases and Transplantation* 29, no. 1 (2018): 178–184. <https://doi.org/10.4103/1319-2442.225190> PMID: 29456226
172. Cairo Sarah B., Agyei Justice, Nyavandu Kavira, Rothstein David H., and Luc Malemo Kalisya. "Neurosurgical management of hydrocephalus by a general surgeon in an extremely low resource setting: initial experience in North Kivu province of Eastern Democratic Republic of Congo." *Pediatric surgery international* 34 (2018): 467–473. <https://doi.org/10.1007/s00383-018-4238-0> PMID: 29453580
173. Xu Linda W., Vaca Silvia D., Nalwanga Juliet, Muhumuza Christine, Vail Daniel, et al. "Life after the neurosurgical ward in Sub-Saharan Africa: neurosurgical treatment and outpatient outcomes in Uganda." *World Neurosurgery* 113 (2018): e153–e160. <https://doi.org/10.1016/j.wneu.2018.01.204> PMID: 29427813
174. Puri Kriti, Kazembe Peter, Mkaliinga Treasure, Chiume Msandeni, Cabrera Antonio G., et al. "Pattern of inpatient pediatric cardiology consultations in sub-Saharan Africa." *Congenital heart disease* 13, no. 2 (2018): 334–341. <https://doi.org/10.1111/chd.12573> PMID: 29372615
175. Muzira Arlene, Kakembo Nasser, Kisa Phyllis, Langer Monica, Sekabira John, et al. "The socioeconomic impact of a pediatric ostomy in Uganda: a pilot study." *Pediatric surgery international* 34 (2018): 457–466. <https://doi.org/10.1007/s00383-018-4230-8> PMID: 29368076
176. Mirambo Mariam M., Majigo Mtebe, Scana Seth D., Mushi Martha F., Aboud Said, et al. "Rubella natural immunity among adolescent girls in Tanzania: the need to vaccinate child bearing aged women." *BMC Women's Health* 18, no. 1 (2018): 1–6.
177. Ekenze Sebastian O., Ajuzieogu Obinna V., and Nwankwo Elochukwu P. "Effect of cardia banding and improved anaesthetic care on outcome of oesophageal atresia in a developing country." *Journal of Tropical Pediatrics* 64, no. 6 (2018): 539–543. <https://doi.org/10.1093/tropej/fmx097> PMID: 29253256
178. Sofianos Chrysis; Christofides Efthimios A.; Phiri Sibusiso E. Seasonal Variation of Orofacial Clefts. *J. Craniofac. Surg.* 2018; 29(2). <https://doi.org/10.1097/SCS.0000000000004226> PMID: 29215449
179. Vivian Lauraine, Comititis George, Naidu Claudia, Hunter Cynthia, and Lawrenson John. "A first qualitative snapshot: cardiac surgery and recovery in 10 children in the Red Cross War Memorial Children's Hospital, Cape Town, South Africa (2011–2016)." *Cardiology in the Young* 28, no. 2 (2018): 322–328. <https://doi.org/10.1017/S1047951117001925> PMID: 29166974
180. Shaye David A., Muchemwa Faith C., Gongga Aleck, and Tollefson Travis T. "Blast SMS text messaging to facilitate enrollment for cleft lip and palate surgery in Zimbabwe." *JAMA facial plastic surgery* 20, no. 3 (2018): 254–256. <https://doi.org/10.1001/jamafacial.2017.1883> PMID: 29145544

181. Gouton Marielle, Lucet Vincent, Bical Olivier, and Leca Francine. "Late management of truncus arteriosus: 20 years of humanitarian experience." *Cardiology in the Young* 28, no. 2 (2018): 302–308. <https://doi.org/10.1017/S1047951117002050> PMID: 29070092
182. Komolafe Edward O., Chiazor Udochukwu Onyia Ibironke O. Ogunbameru, Dada Oluwamuyiwa A., Owagbemi Oluwafemi F., et al. Obamwonyi, and Muhammad I. Abdullahi. "The pattern, peculiarities, and management challenges of spina bifida in a teaching hospital in Southwest Nigeria." *Child's Nervous System* 34 (2018): 311–319. <https://doi.org/10.1007/s00381-017-3614-8> PMID: 29026989
183. Ekwochi Uchenna, Isaac Nwabueze Asinobi Donatus Chidiebere Ignatius Osuorah, Ikenna Kingsley Ndu Christain Ifediora, et al. "Pattern of congenital anomalies in newborn: a 4-year surveillance of newborns delivered in a tertiary healthcare facility in the south-east Nigeria." *Journal of tropical pediatrics* 64, no. 4 (2018): 304–311. <https://doi.org/10.1093/tropej/fmx067> PMID: 28977670
184. Kamdem Félicité, Danielle Kedy Koum Ba Hamadou, Yemdji Mélanie, Luma Henry, et al. "Clinical, echocardiographic, and therapeutic aspects of congenital heart diseases of children at D ouala General Hospital: A cross-sectional study in sub-Saharan Africa." *Congenital Heart Disease* 13, no. 1 (2018): 113–117. <https://doi.org/10.1111/chd.12529> PMID: 28871660
185. Kulkarni Abhaya V., Schiff Steven J., Edith Mbabazi-Kabachelor John Mugamba, Ssenyonga Peter, et al. "Endoscopic treatment versus shunting for infant hydrocephalus in Uganda." *New England Journal of Medicine* 377, no. 25 (2017): 2456–2464. <https://doi.org/10.1056/NEJMoa1707568> PMID: 29262276
186. Shah Mansi, Gallaher Jared, Msiska Nelson, Sean E. McLean, and Anthony G. Charles. "Colostomy as a Bridge to Definitive Pediatric Surgical Care: A Sub-Saharan African Experience." *The American Surgeon* 83, no. 9 (2017): 367–369.
187. Adekanye Adedeji O., Adefemi Samuel A., Onawola Kayode A., James John A., Adeleke Ibrahim T., et al. "Abnormalities of the external genitalia and groins among primary school boys in Bida, Nigeria." *African Health Sciences* 17, no. 4 (2017): 1120–1125. <https://doi.org/10.4314/ahs.v17i4.20> PMID: 29937883
188. Swarray-Deen Alim, Seffah Joseph D., and Deliverance A. Antwi-Agyei. "Two cases of pentalogy of Cantrell diagnosed antenatally at Korle Bu Teaching Hospital, Accra." *Ghana Medical Journal* 51, no. 4 (2017): 191–195. PMID: 29622834
189. Smythe Tracey, Wainwright Andrew, Foster Allen, and Lavy Christopher. "What is a good result after clubfoot treatment? A Delphi-based consensus on success by regional clubfoot trainers from across Africa." *PLoS One* 12, no. 12 (2017): e0190056. <https://doi.org/10.1371/journal.pone.0190056> PMID: 29267350
190. Mohammed Mustefa, Amezene Tadesse, and Tamirat Moges. "Intestinal obstruction in early neonatal period: a 3-year review of admitted cases from a tertiary hospital in Ethiopia." *Ethiopian journal of health sciences* 27, no. 4 (2017): 393–400. <https://doi.org/10.4314/ejhs.v27i4.10> PMID: 29217941
191. Musiime Grace M., Doris MW Kinuthia Donald P. Oyatsi, and Manguyu Wangui. "Joubert's syndrome and related disorders and home-based peritoneal dialysis in East Africa: a case report." *BMC research notes* 10, no. 1 (2017): 1–5.
192. Ekure Ekanem N., Fidelia Bode-Thomas Wilson E. Sadoh, Orogade Adeola A., Otaigbe Barbara E., et al. "Congenital heart defects in Nigerian children: preliminary data from the National Pediatric Cardiac Registry." *World Journal for Pediatric and Congenital Heart Surgery* 8, no. 6 (2017): 699–706. <https://doi.org/10.1177/2150135117725457> PMID: 29187100
193. Hamze Hasan, Mengiste Asrat, and Carter Jane. "The impact and cost-effectiveness of the amref health Africa-smile train cleft lip and palate surgical repair programme in eastern and central Africa." *Pan African Medical Journal* 28, no. 1 (2017). <https://doi.org/10.11604/pamj.2017.28.35.10344> PMID: 29184597
194. Smythe Tracey, Mudariki Debra, Kuper Hannah, Lavy Christopher, and Foster Allen. "Assessment of success of the Ponseti method of clubfoot management in sub-Saharan Africa: a systematic review." *BMC musculoskeletal disorders* 18 (2017): 1–10.
195. Sileshi Lidia, and Tefera Endale. "Health-related quality of life of mothers of children with congenital heart disease in a sub-Saharan setting: Cross-sectional comparative study." *BMC Research Notes* 10, no. 1 (2017): 1–5.
196. Dessie Meselech Ambaw, Ejigu Gebeye Zeleke Shimelash Bitew Workie, and Ayanaw Worku Berihun. "Folic acid usage and associated factors in the prevention of neural tube defects among pregnant women in Ethiopia: cross-sectional study." *BMC pregnancy and childbirth* 17, no. 1 (2017): 1–8. <https://doi.org/10.1186/s12884-017-1506-2> PMID: 28934941
197. Santos Maria M., Rubagumya Derick K., Dominic Imani, Brighton Amos, Colombe Soledad, et al. "Infant hydrocephalus in sub-Saharan Africa: the reality on the Tanzanian side of the lake." *Journal of*

- Neurosurgery: Pediatrics 20, no. 5 (2017): 423–431. <https://doi.org/10.3171/2017.5.PEDS1755> PMID: 28885096
198. Nunes Maria Ana S., Manuel P. Magalhães, Miguel S. Uva, Patrícia Heitor, Ana Henriques, et al. "A multinational and multidisciplinary approach to treat CHD in paediatric age in Angola: initial experience of a medical-surgical centre for children with heart disease in Angola." *Cardiology in the Young* 27, no. 9 (2017): 1755–1763. <https://doi.org/10.1017/S1047951117001202> PMID: 28689504
  199. Cairo Sarah, Kakembo Nasser, Kisa Phyllis, Muzira Arlene, Cheung Maija, et al. "Disparity in access and outcomes for emergency neonatal surgery: intestinal atresia in Kampala, Uganda." *Pediatric Surgery International* 33 (2017): 907–915. <https://doi.org/10.1007/s00383-017-4120-5> PMID: 28677072
  200. Bruneel Laura; Luyten Anke; Bettens Kim; D'haeseleer Evelien; Dhondt Cleo; Hodges Andrew; et al. Delayed primary palatal closure in resource-poor countries: Speech results in Ugandan older children and young adults with cleft (lip and) palate. *J. Commun. Disord.* 2017; 69(). <https://doi.org/10.1016/j.jcomdis.2017.06.010> PMID: 28675808
  201. Mbuyi-Musanazayi Sébastien, F. Tshilombo Katombe, P. Lukusa Tshilobo, P. Kalenga Mwenze Kayamba, Koenraad Devriendt, et al. "Anthropometric and aesthetic outcomes for the nasolabial region in 101 consecutive African children with unilateral cleft lip one year after repair using the anatomical subunit approximation technique." *International Journal of Oral and Maxillofacial Surgery* 46, no. 10 (2017): 1338–1345. <https://doi.org/10.1016/j.ijom.2017.05.022> PMID: 28629945
  202. vd Merwe Elmarie, Cox S, and Numanoglu A. "Anorectal malformations, associated congenital anomalies and their investigation in a South African setting." *Pediatric Surgery International* 33 (2017): 875–882. <https://doi.org/10.1007/s00383-017-4109-0> PMID: 28612139
  203. Tadele Henok, and Chanie Abeje. "Thoracic ectopia cordis in an Ethiopian neonate." *Ethiopian journal of health sciences* 27, no. 2 (2017): 203–205. <https://doi.org/10.4314/ejhs.v27i2.14> PMID: 28579717
  204. Kaur Loyal Poonamjeet, Nderitu Joseph Munyiri, and Wekesa Vincent Dismus. "Clinical analysis of aqueductal stenosis in patients with hydrocephalus in a Kenyan setting." *The Pan African Medical Journal* 26, no. 106 (2017).
  205. Olusoji Olugbenga O., Sanni Saheed B., Omodara Omotayo O., and Akerele Oluwaseye F. "Isolated sternal cleft in a patient with atrial septal defect: A rare sole association." *Nigerian Postgraduate Medical Journal* 24, no. 1 (2017): 60. [https://doi.org/10.4103/npmj.npmj\\_1\\_17](https://doi.org/10.4103/npmj.npmj_1_17) PMID: 28492212
  206. Sims-Williams Helen J.; Sims-Williams Hugh P.; Mbabazi Kabachelor, Edith; Warf Benjamin C. Quality of life among children with spina bifida in Uganda. *Arch. Dis. Child.* 2017; 102(11). <https://doi.org/10.1136/archdischild-2016-312307> PMID: 28490461
  207. Dellicour Stephanie, Sevene Esperança, Rose McGready Halidou Tinto, Moshia Dominic, et al. "First-trimester artemisinin derivatives and quinine treatments and the risk of adverse pregnancy outcomes in Africa and Asia: a meta-analysis of observational studies." *PLoS medicine* 14, no. 5 (2017): e1002290. <https://doi.org/10.1371/journal.pmed.1002290> PMID: 28463996
  208. Tony Nengom J., Sap Ngo Um S., Chelo D., Mbono Betoko R., Boombhi J., Mouafo Tambo F., et al. "Assessment of cardiac function in children with congenital adrenal hyperplasia: a case control study in Cameroon." *BMC pediatrics* 17, no. 1 (2017): 1–8.
  209. Kheir Abdelmoneim EM, Ibrahim Salah A., Hamed Ahlam A., Yousif Badreldin M., and Hamid Farouk A. "Brain tuberculoma, an unusual cause of stroke in a child with trisomy 21: a case report." *Journal of Medical Case Reports* 11, no. 1 (2017): 1–4.
  210. Kija E., Schlegel B., Pauline Samia M. Wessels, and Wilmshurst J. M. "Tuberous sclerosis complex in the Western Cape, South Africa: The clinical presentation features." *South African Medical Journal* 107, no. 4 (2017): 295–298. <https://doi.org/10.7196/SAMJ.2017.v107i4.12040> PMID: 28395677
  211. Ajibola Gbolahan, Zash Rebecca, Shapiro Roger L., Batlang Oganne, Botebele Kerapetse, et al. "Detecting congenital malformations-lessons learned from the Mpepu study, Botswana." *PloS One* 12, no. 3 (2017): e0173800. <https://doi.org/10.1371/journal.pone.0173800> PMID: 28339500
  212. Wonkam Ambroise, Toko Ricardo, Chelo David, Cedrik Tekendo-Ngongang Samuel Kingue, et al. "The 22q11.2 deletion syndrome in congenital heart defects: prevalence of microdeletion syndrome in Cameroon." *Global heart* 12, no. 2 (2017): 115–120. <https://doi.org/10.1016/j.ghcart.2017.01.003> PMID: 28302550
  213. Nagalo Kisito, Issou Ouédraogo Jean-Martin Laberge, Louise Caouette-Laberge, and Jean Turgeon. "Congenital malformations and medical conditions associated with orofacial clefts in children in Burkina Faso." *BMC pediatrics* 17 (2017): 1–6. <https://doi.org/10.1186/s12887-017-0833-9> PMID: 28292285
  214. Poenaru Dan, Pemberton J., Frankfurter C., Cameron B. H, and Elly Stolk. "Establishing disability weights for congenital pediatric surgical conditions: a multi-modal approach." *Population Health Metrics* 15 (2017): 1–11.

215. Nwafor Ikechukwu A.; Chinawa Josephat M.; Adiele Daberechi K.; Arodiwe Ijeoma O.; Ezemba Ndu-bueze; Eze, John C.; Omeje Ikenna; et al. Management of complex CHD at the National Cardiothoracic Center of Excellence, University of Nigeria Teaching Hospital, Enugu: the role of foreign cardiac missions in 3.5 years. *Cardiol. Young* 2017; 27(6). <https://doi.org/10.1017/S1047951116002766> PMID: 28120739
216. Tungotyo Martin, Atwine Daniel, Nanjebe Deborah, Hodges Andrew, and Situma Martin. "The prevalence and factors associated with malnutrition among infants with cleft palate and/or lip at a hospital in Uganda: a cross-sectional study." *BMC pediatrics* 17, no. 1 (2017): 1–7.
217. Theron Andre; Numanoglu Alp. Birth Prevalence of Anorectal Malformations for the Western Cape Province, South Africa, 2005 to 2012. 2017; 27(5). <https://doi.org/10.1055/s-0036-1597945> PMID: 28081578
218. Batte Anthony, Lwabi Peter, Lubega Sulaiman, Kiguli Sarah, Otworld Kennedy, et al. "Wasting, underweight and stunting among children with congenital heart disease presenting at Mulago hospital, Uganda." *BMC pediatrics* 17, no. 1 (2017): 1–7.
219. Laeke Tsegazeab, Tirsit Abenezer, Biluts Hagos, Murali Deeptha, and Wester Knut. "Pediatric hydrocephalus in Ethiopia: treatment failures and infections: a hospital-based, retrospective study." *World neurosurgery* 100 (2017): 30–37. <https://doi.org/10.1016/j.wneu.2016.12.112> PMID: 28057596
220. Smythe Tracey, Kuper Hannah, Macleod David, Foster Allen, and Lavy Christopher. "Birth prevalence of congenital talipes equinovarus in low- and middle-income countries: a systematic review and meta-analysis." *Tropical medicine & international health* 22, no. 3 (2017): 269–285. <https://doi.org/10.1111/tmi.12833> PMID: 28000394
221. Eshete Mekonen, Butali Azeez, Deressa Wakgari, Keyla Pagan-Rivera Taye Hailu, et al. "Descriptive epidemiology of orofacial clefts in Ethiopia." *The Journal of craniofacial surgery* 28, no. 2 (2017): 334. <https://doi.org/10.1097/SCS.0000000000003234> PMID: 27984437
222. Mombo Landry-Erik, Leslie-Monica Yangawagou-Eyeghe Patrick Mickala, Jean Moutélé Thierno-Souleymane Bah, et al. "Patterns and risk factors of birth defects in rural areas of south-eastern Gabon." *Congenital anomalies* 57, no. 3 (2017): 79–82. <https://doi.org/10.1111/cga.12201> PMID: 27859649
223. Sims-Williams Helen J., Hugh P. Sims-Williams, Edith Mbabazi Kabachelor, James Fotheringham, and Benjamin C. Warf. "Ten-year survival of Ugandan infants after myelomeningocele closure." *Journal of Neurosurgery: Pediatrics* 19, no. 1 (2017): 70–76. <https://doi.org/10.3171/2016.7.PEDS16296> PMID: 27767901
224. Ganie Yasmeen, Aldous Colleen, Balakrishna Yusenantha, and Wiersma Rinus. "Disorders of sex development in children in KwaZulu-Natal Durban South Africa: 20-year experience in a tertiary centre." *Journal of Pediatric Endocrinology and Metabolism* 30, no. 1 (2017): 11–18. <https://doi.org/10.1515/jpem-2016-0152> PMID: 27754965
225. Ibrahim Musa, Nasiru Jinjiri Ismail Mohammad Aminu Mohammad, Ismail Hassan, Misbahu Haruna Ahmed, et al. "Managing fecal incontinence in patients with myelomeningocele in Sub-Saharan Africa: role of antegrade continence enema (ACE)." *Journal of Pediatric Surgery* 52, no. 4 (2017): 554–557. <https://doi.org/10.1016/j.jpedsurg.2016.08.014> PMID: 27634558
226. Ali Hiba Mohamed, Mustafa Manal, Hasabalrasol Siham, Osama Hafiz Elshazali Elwalid Fadul Nasir, et al. "Presence of plaque, gingivitis and caries in Sudanese children with congenital heart defects." *Clinical oral investigations* 21 (2017): 1299–1307. <https://doi.org/10.1007/s00784-016-1884-2> PMID: 27343145
227. Mola Kebede, and Shimelis Damte. "Pattern and Outcome of Renal Diseases in Hospitalized Children in Tikur Anbessa Specialized Teaching Hospital, Addis Ababa, Ethiopia." *Ethiopian medical journal* 54, no. 3 (2016): 117–123. PMID: 29115778
228. Barr Megan D., Govender Pragashnie, and Rencken Gina. "Raising a child with Down's syndrome: perspectives from South African urban care-givers." *African Health Sciences* 16, no. 4 (2016): 929–935. <https://doi.org/10.4314/ahs.v16i4.7> PMID: 28479883
229. Musapudi Eric Mbuya, Didier Tshibangu Mujinga, and Guy Nday Ilunga. "Neonatal obstruction associated with duodenal diaphragm: about a case." *The Pan African Medical Journal* 25 (2016): 85–85.
230. Tougouma SJ, Kissou SA, Aimé Arsène Yaméogo, Nobila Valentin Yaméogo, Aimé Bama, Makoura Barro, et al. "Cardiopathies in children hospitalized at the University hospital Sourou Sanou, Bobo-Dioulasso: echocardiographic and therapeutic aspects." *The Pan African Medical Journal* 25 (2016): 62–62. <https://doi.org/10.11604/pamj.2016.25.62.9508> PMID: 28250886
231. Felicien Mouafo Tambo Faustin, Nwaha Makon AS, Kamadjou C., Fossi G., Le Coultré C., et al. "Our experience of proximal hypospadias repair using the Cloutier–Bracka technique at the Gynaeco-Obstetric and Paediatric Hospital, Yaounde-Cameroon." *African journal of paediatric surgery: AJPS* 13, no. 4 (2016): 193. <https://doi.org/10.4103/0189-6725.194673> PMID: 28051050

232. Njoh Andreas Ateke, Sarah Namondo Njoh, and Messang Blandine Abizou. "Fetal malformation in maternal toxoplasma and rubella co-infection in Cameroon: a case report." *Journal of medical case reports* 10, no. 1 (2016): 1–3. <https://doi.org/10.1186/s13256-016-1133-y> PMID: 27912790
233. Omer Ilham M., Abdullah Osman M., Mohammed Inaam N., and Abbasher Lina A. "prevalence of neural tube defects Khartoum, Sudan august 2014–July 2015." *BMC research notes* 9 (2016): 1–4.
234. Uche E. O., Okorie E., Emejulu J., Ajuzieogu O., and Uche N. J. "Challenges and outcome of cranial neuroendoscopic surgery in a resource constrained developing African country." *Nigerian Journal of Clinical Practice* 19, no. 6 (2016): 811–815. <https://doi.org/10.4103/1119-3077.183236> PMID: 27811456
235. Giles Kagmeni, Raoul Cheuteu, Yannick Bilong, and Peter Wiedemann. "Uveal coloboma: about 3 cases at the University Teaching Hospital, Yaounde, Cameroon." *Pan African Medical Journal* 24, no. 1 (2016).
236. Massenburg Benjamin B., Jenny Hillary E., Saluja Saurabh, Meara John G., Shrimel Mark G., et al. "Barriers to cleft lip and palate repair around the world." *Journal of Craniofacial Surgery* 27, no. 7 (2016): 1741–1745. <https://doi.org/10.1097/SCS.0000000000003038> PMID: 27763973
237. Taye Molla, Afework Mekbeb, Fantaye Wondwossen, Diro Ermias, and Worku Alemayehu. "Magnitude of birth defects in central and Northwest Ethiopia from 2010–2014: a descriptive retrospective study." *PloS one* 11, no. 10 (2016): e0161998. <https://doi.org/10.1371/journal.pone.0161998> PMID: 27706169
238. Sadoh Wilson E., Ikhurionan Paul, and Imarengiaye Charles. "Pre-anesthetic echocardiographic findings in children undergoing non-cardiac surgery at the University of Benin Teaching Hospital, Nigeria: cardiovascular topics." *Cardiovascular Journal of Africa* 27, no. 5 (2016): 276–280.
239. Weil Alexander G., Westwick Harrison, Wang Shelly, Alotaibi Naif M., Elkaim Lior, et al. "Efficacy and safety of endoscopic third ventriculostomy and choroid plexus cauterization for infantile hydrocephalus: a systematic review and meta-analysis." *Child's nervous system* 32 (2016): 2119–2131. <https://doi.org/10.1007/s00381-016-3236-6> PMID: 27613635
240. Kaimbo D. Kaimbo Wa. "Frequency of prepapillary vascular loops in Congolese patients." *Journal Français d'Ophtalmologie* 39, no. 8 (2016): 711–715. <https://doi.org/10.1016/j.jfo.2016.07.005> PMID: 27613334
241. Yawson Alfred E., Abuosi Aaron A., Badasu Delali M., Atobra Deborah, Adzei Francis A., et al. "Non-communicable diseases among children in Ghana: health and social concerns of parent/caregivers." *African health sciences* 16, no. 2 (2016): 378–388. <https://doi.org/10.4314/ahs.v16i2.6> PMID: 27605953
242. Abdulkadir Mohammed, and Abdulkadir Zainab. "A systematic review of trends and patterns of congenital heart disease in children in Nigeria from 1964–2015." *African health sciences* 16, no. 2 (2016): 367–377. <https://doi.org/10.4314/ahs.v16i2.5> PMID: 27605952
243. Edwin Frank, Kow Entsua-Mensah Lawrence A. Sereboe, Tettey Mark M., Aniteye Ernest A., et al. "Conotruncal heart defect repair in sub-Saharan Africa: remarkable outcomes despite poor access to treatment." *World Journal for Pediatric and Congenital Heart Surgery* 7, no. 5 (2016): 592–599. <https://doi.org/10.1177/2150135116648309> PMID: 27587494
244. Eke Christopher Bismarck, Enoch Ogbonnaya Uche Josephat Maduabuchi Chinawa, Ikechukwu Emmanuel Obi, Herbert Anayo Obu, et al. "Epidemiology of congenital anomalies of the central nervous system in children in Enugu, Nigeria: A retrospective study." *Annals of African medicine* 15, no. 3 (2016): 126. <https://doi.org/10.4103/1596-3519.188892> PMID: 27549417
245. Wesonga Anne S., Fitzgerald Tamara N., Kabuye Ronald, Kirunda Samuel, Langer Monica, et al. "Gastroschisis in Uganda: opportunities for improved survival." *Journal of pediatric surgery* 51, no. 11 (2016): 1772–1777. <https://doi.org/10.1016/j.jpedsurg.2016.07.011> PMID: 27516176
246. Tambo FF Mouafo S. Dahoun, Kamadjou C., Makon AS Nwaha, Fossi G., et al. "Mixed gonadal dysgenesis in Yaoundé: A preliminary experience about three cases." *African Journal of Paediatric Surgery* 13, no. 3 (2016): 145–149.
247. Osei-Nketiah Samuel, Afua AJ Hesse William Appeadu-Mensah, Hope Glover-Addy Victor K. Etwire, et al. "Management of oesophageal atresia in a developing country: Is primary repair forbidden?" *African Journal of Paediatric Surgery* 13, no. 3 (2016): 114. <https://doi.org/10.4103/0189-6725.187801> PMID: 27502878
248. Usang Usang E., Agan Thomas U., Inyang Akan W., Emehute John-Daniel C., and Itam Itam H. "Syndromic anorectal malformation associated with Holt–Oram syndrome, microcephaly, and bilateral corneal opacity: a case report." *Journal of Medical Case Reports* 10, no. 1 (2016): 1–5. <https://doi.org/10.1186/s13256-016-1011-7> PMID: 27495810
249. Pukuta Elizabeth, Diane Waku-Kouomou Emily Abernathy, Benoit Kebela Illunga, Ricardo Obama, et al. "Genotypes of rubella virus and the epidemiology of rubella infections in the Democratic Republic

- of the Congo, 2004–2013." *Journal of medical virology* 88, no. 10 (2016): 1677–1684. <https://doi.org/10.1002/jmv.24517> PMID: 27479298
250. Dakurah Thomas K., Adams Fuseini, Iddrissu Mutawakilu, George Kojo Wepeba Harry Akoto, et al. "Management of hydrocephalus with ventriculoperitoneal shunts: review of 109 cases of children." *World Neurosurgery* 96 (2016): 129–135. <https://doi.org/10.1016/j.wneu.2016.06.111> PMID: 27392895
251. Smythe Tracey, Chandramohan Daniel, Bruce Jane, Kuper Hannah, Lavy Christopher, et al. "Results of clubfoot treatment after manipulation and casting using the Ponseti method: experience in Harare, Zimbabwe." *Tropical medicine & international health* 21, no. 10 (2016): 1311–1318. <https://doi.org/10.1111/tmi.12750> PMID: 27388947
252. Ezeofor S. N., Njeze N. R., Aghaji M. N., Onuh A. C., and Obikili E. N. "The prevalence of cervical ribs in Enugu, Nigeria." *Nigerian Journal of Clinical Practice* 19, no. 4 (2016): 513–516. <https://doi.org/10.4103/1119-3077.183315> PMID: 27251970
253. Eriksen Arvid A., Johnsen Joakim S., Anders H. Tennøe, Abenezzer Tirsit, Tsegazeab Laeke, et al. "Implementing routine head circumference measurements in Addis Ababa, Ethiopia: means and challenges." *World Neurosurgery* 91 (2016): 592–596. <https://doi.org/10.1016/j.wneu.2016.04.132> PMID: 27185652
254. Biluts Hagos, and Azarias Kassahun Admasu. "Outcome of endoscopic third ventriculostomy in pediatric patients at Zewditu Memorial Hospital, Ethiopia." *World Neurosurgery* 92 (2016): 360–365. <https://doi.org/10.1016/j.wneu.2016.04.114> PMID: 27157284
255. Korsaga/Some N.; Salissou L.; Tapsoba G. P.; Ouedraogo M. S.; Traore F.; Doulla M.; et al. [Ichthyosis and social stigma in Burkina Faso]. *Ann.Dermatol.Venereol.*2016; 143(44447).
256. Weber Chantel Lynette. "Understanding fragile X syndrome from a mother's perspective: Challenges and resilience." *International journal of qualitative studies on health and well-being* 11, no. 1 (2016): 29512. <https://doi.org/10.3402/qhw.v11.29512> PMID: 27104339
257. Idiiodi-Thomas Hestia O., Ademuyiwa Adesoji O., Elebute Olumide A., Alakaloko Felix M., and Bode Christopher O. "Factors influencing waiting time in hypospadias repair surgery." *Nigerian Postgraduate Medical Journal* 23, no. 1 (2016): 21. <https://doi.org/10.4103/1117-1936.180152> PMID: 27098945
258. Okonta Kelechi E., and Charles I. Tobin-West. "Challenges with the establishment of congenital cardiac surgery centers in Nigeria: survey of cardiothoracic surgeons and residents." *Journal of Surgical Research* 202, no. 1 (2016): 177–181. <https://doi.org/10.1016/j.jss.2015.12.040> PMID: 27083964
259. Batte Anthony, Lwabi Peter, Lubega Sulaiman, Kiguli Sarah, Nabatte Violette, et al. "Prevalence of arrhythmias among children below 15 years of age with congenital heart diseases attending Mulago National Referral Hospital, Uganda." *BMC Cardiovascular Disorders* 16, no. 1 (2016): 1–7. <https://doi.org/10.1186/s12872-016-0243-1> PMID: 27074797
260. Luyten Anke, Bettens Kim, Evelien D'haeseleer Andrew Hodges, Galiwango George, et al. "Short-term effect of short, intensive speech therapy on articulation and resonance in Ugandan patients with cleft (lip and) palate." *Journal of communication disorders* 61 (2016): 71–82. <https://doi.org/10.1016/j.jcomdis.2016.03.006> PMID: 27060419
261. Ford Kat, Poenaru Dan, Moulot Olivier, Tavener Kate, Bradley Sarah, et al. "Gastroschisis: Bellwether for neonatal surgery capacity in low resource settings?." *Journal of pediatric surgery* 51, no. 8 (2016): 1262–1267. <https://doi.org/10.1016/j.jpedsurg.2016.02.090> PMID: 27032610
262. Isiekwe G. I.; Oguchi C. O.; daCosta O. O.; Utomi I. L. Craniofacial orthodontics and postgraduate orthodontic training in Nigeria. 2016; 19(3). <https://doi.org/10.4103/1119-3077.179277> PMID: 27022803
263. Faldini C., Prospero L., Traina F., Nanni M., Tesfaghiorghi S., Tsegay S., et al. "Surgical treatment of neglected congenital idiopathic talipes equinovarus after walking age in Eritrea: an Italo-Eritrean cooperation." *Musculoskeletal surgery* 100 (2016): 133–137. <https://doi.org/10.1007/s12306-016-0398-z> PMID: 26965500
264. Awoleke Jacob Olumuyiwa, and Adanikin Abiodun Idowu. "Baird-pattinson aetiological classification and phases of delay contributing to stillbirths in a Nigerian tertiary hospital." *Journal of Pregnancy* 2016 (2016).
265. Govender S., and Wiersma R. "Delayed diagnosis of anorectal malformations (ARM): causes and consequences in a resource-constrained environment." *Pediatric surgery international* 32 (2016): 369–375. <https://doi.org/10.1007/s00383-016-3866-5> PMID: 26790675
266. Ekenze Sebastian O., Ajuzieogu Obinna V., and Nwomeh Benedict C. "Challenges of management and outcome of neonatal surgery in Africa: a systematic review." *Pediatric surgery international* 32 (2016): 291–299. <https://doi.org/10.1007/s00383-016-3861-x> PMID: 26783085
267. Greyvensteyn Gerhardus A., and Madaree Anil. "A low-cost method of craniofacial distraction osteogenesis." *Journal of Plastic, Reconstructive & Aesthetic Surgery* 69, no. 3 (2016): 409–416. <https://doi.org/10.1016/j.bjps.2015.10.034> PMID: 26687792



268. Bastaki Fatma, Mohamed Madiha, Nair Pratibha, Saif Fatima, Tawfiq Nafisa, et al. "Novel splice-site mutation in WDR 62 revealed by whole-exome sequencing in a Sudanese family with primary microcephaly." *Congenital Anomalies* 56, no. 3 (2016): 135–137. <https://doi.org/10.1111/cga.12144> PMID: 26577670
269. Rickard Jennifer L., Ntakiyiruta Georges, and Chu Kathryn M. "Associations with perioperative mortality rate at a major referral hospital in Rwanda." *World journal of surgery* 40 (2016): 784–790. <https://doi.org/10.1007/s00268-015-3308-x> PMID: 26546186
270. Ganie Iqbal Siddi, Amod Khatija, and Reddy Darshan. "Vascular rings: a radiological review of anatomical variations: cardiovascular topics." *Cardiovascular Journal of Africa* 27, no. 1 (2016): 30–36.
271. Uwineza Annette, Hitayezu Janvier, Jamar Mauricette, Caberg Jean-Hubert, Murorunkwere Seraphine, et al. "Cytogenetic studies of rwandan pediatric patients presenting with global developmental delay, intellectual disability and/or multiple congenital anomalies." *Journal of Tropical Pediatrics* 62, no. 1 (2016): 38–45. <https://doi.org/10.1093/tropej/fmv065> PMID: 26507407
272. Awoyale Tayo, Onajole Adebayo T., Ogunnowo Babatunde E., Adeyemo Wasiu L., Wanyonyi Kristina L., et al. "Quality of life of family caregivers of children with orofacial clefts in Nigeria: a mixed-method study." *Oral diseases* 22, no. 2 (2016): 116–122. <https://doi.org/10.1111/odi.12379> PMID: 26456150
273. Sixty-Third World Health Assembly—Resolution 63.17. *Birth Defects*, 2014 (2010).
274. Flores A, Valencia D, Sekkarie A, Hillard CL, Williams J, Groisman B, et al. Building capacity for birth defects surveillance in Africa: implementation of an intermediate birth defects surveillance workshop. *Journal of global health perspectives*. 2015;2015. PMID: 26753106
275. Organization WH, Control CfD, Prevention. *Birth defects surveillance: quick reference handbook of selected congenital anomalies and infections*. 2020.
276. Murni IK, Wibowo T, Arafuri N, Oktaria V, Dinarti LK, Panditawati D, et al. Feasibility of screening for critical congenital heart disease using pulse oximetry in Indonesia. *BMC pediatrics*. 2022; 22(1):1–8.
277. Cabanas AM, Fuentes-Guajardo M, Latorre K, León D, Martín-Escudero P. Skin Pigmentation Influence on Pulse Oximetry Accuracy: A Systematic Review and Bibliometric Analysis. *Sensors*. 2022; 22(9):3402. <https://doi.org/10.3390/s22093402> PMID: 35591092
278. Vesoulis Z, Tims A, Lodhi H, Lalos N, Whitehead H. Racial discrepancy in pulse oximeter accuracy in preterm infants. *Journal of Perinatology*. 2022; 42(1):79–85. <https://doi.org/10.1038/s41372-021-01230-3> PMID: 34642469
279. Goley SM, Sakula-Barry S, Adofo-Ansong N, Ntawunga LI, Botchway MT, Kelly AH, et al. Investigating the use of ultrasonography for the antenatal diagnosis of structural congenital anomalies in low-income and middle-income countries: a systematic review. *BMJ Paediatr Open*. 2020; 4(1). <https://doi.org/10.1136/bmjpo-2020-000684> PMID: 32864479
280. Kakembo N, Godier-Furnemont A, Nabirye A, Cheung M, Kisa P, Muzira A, et al. Barriers to pediatric surgical care in low-income countries: the three delays' impact in Uganda. *Journal of surgical research*. 2019; 242:193–9. <https://doi.org/10.1016/j.jss.2019.03.058> PMID: 31085367
281. Day TG, Kainz B, Hajnal J, Razavi R, Simpson JM. Artificial intelligence, fetal echocardiography, and congenital heart disease. *Prenatal Diagnosis*. 2021; 41(6):733–42.
282. Blair GK, Duffy D, Birabwa-Male D, Sekabira J, Reimer E, Koyle M, et al. Pediatric surgical camps as one model of global surgical partnership: a way forward. *Journal of Pediatric Surgery*. 2014; 49(5):786–90. <https://doi.org/10.1016/j.jpedsurg.2014.02.069> PMID: 24851771
283. Ozgediz D, Langer M, Kisa P, Poenaru D. Pediatric surgery as an essential component of global child health. *Seminars in Pediatric Surgery*. 2016; 25(1):3–9. <https://doi.org/10.1053/j.sempedsurg.2015.09.002> PMID: 26831131
284. Zash R, Holmes L, Diseko M, Jacobson DL, Brummel S, Mayondi G, et al. Neural-tube defects and antiretroviral treatment regimens in Botswana. *New England Journal of Medicine*. 2019; 381(9):827–40. <https://doi.org/10.1056/NEJMoa1905230> PMID: 31329379
285. Taruscio D, Arriola L, Baldi F, Barisic I, Bermejo-Sánchez E, Bianchi F, et al. European recommendations for primary prevention of congenital anomalies: a joined effort of EUROCAT and EUROPLAN projects to facilitate inclusion of this topic in the National Rare Disease Plans. *Public Health Genomics*. 2014; 17(2):115–23. <https://doi.org/10.1159/000360602> PMID: 24714026
286. Kancherla V, Chadha M, Rowe L, Thompson A, Jain S, Walters D, et al. Reducing the burden of Anemia and neural tube defects in low-and middle-income countries: an analysis to identify countries with an immediate potential to benefit from large-scale mandatory fortification of wheat flour and Rice. *Nutrients*. 2021; 13(1):244. <https://doi.org/10.3390/nu13010244> PMID: 33467050
287. Christianson A, Howson CP, Modell B. *March of Dimes: global report on birth defects, the hidden toll of dying and disabled children*. 2006.

288. Mehta U, Smith M, Kalk E, Hayes H, Swart A, Tucker L, et al. Understanding and Responding to Prescribing Patterns of Sodium Valproate-Containing Medicines in Pregnant Women and Women of Childbearing Age in Western Cape, South Africa. *Drug safety*. 2021; 44(1):41–51. <https://doi.org/10.1007/s40264-020-00987-4> PMID: 32844313
289. Pastuszek AL, Schüler L, Speck-Martins CE, Coelho K-EF, Cordello SM, Vargas F, et al. Use of misoprostol during pregnancy and Möbius' syndrome in infants. *New England Journal of Medicine*. 1998; 338(26):1881–5.
290. Leke AZ, Dolk H, Loane M, Casson K, Maboh NM, Maeya SE, et al. Prevalence, determinants and attitude towards herbal medicine use in the first trimester of pregnancy in Cameroon: A survey in 20 hospitals. *PLOS Global Public Health*. 2022; 2(8):e0000726. <https://doi.org/10.1371/journal.pgph.0000726> PMID: 36962818
291. Larrandaburu M, Vianna FSL, Silva AAd, Nacul L, Sanseverino MTV, Schuler-Faccini L. Zika virus infection and congenital anomalies in the Americas: opportunities for regional action. *Revista Panamericana de Salud Pública*. 2018; 41:e174.
292. Newman L, Kamb M, Hawkes S, Gomez G, Say L, Seuc A, et al. Global estimates of syphilis in pregnancy and associated adverse outcomes: analysis of multinational antenatal surveillance data. *PLoS medicine*. 2013; 10(2):e1001396. <https://doi.org/10.1371/journal.pmed.1001396> PMID: 23468598
293. Dasa TT, Geta TG, Yalew AZ, Abebe RM, Kele HU. Toxoplasmosis infection among pregnant women in Africa: A systematic review and meta-analysis. *PloS one*. 2021; 16(7):e0254209. <https://doi.org/10.1371/journal.pone.0254209> PMID: 34283858
294. Torgerson PR, Mastroiacovo P. The global burden of congenital toxoplasmosis: a systematic review. *Bulletin of the World Health Organization*. 2013; 91:501–8. <https://doi.org/10.2471/BLT.12.111732> PMID: 23825877
295. Bates M. and Brantsaeter A.B., 2016. Human cytomegalovirus (CMV) in Africa: a neglected but important pathogen. *Journal of virus eradication*, 2(3), pp.136–142. PMID: 27482452
296. Mhandire D, Rowland-Jones S, Mhandire K, Kaba M, Dandara C. Epidemiology of Cytomegalovirus among pregnant women in Africa. *The Journal of Infection in Developing Countries*. 2019; 13(10):865–76. <https://doi.org/10.3855/jidc.11373> PMID: 32084016
297. Joubert BR, Mantooh SN, McAllister KA. Environmental health research in Africa: important progress and promising opportunities. *Frontiers in Genetics*. 2020; 10:1166. <https://doi.org/10.3389/fgene.2019.01166> PMID: 32010175
298. May PA, Marais A-S, De Vries MM, Buckley D, Kalberg WO, Hasken JM, et al. The prevalence, child characteristics, and maternal risk factors for the continuum of fetal alcohol spectrum disorders: A sixth population-based study in the same South African community. *Drug and alcohol dependence*. 2021; 218:108408. <https://doi.org/10.1016/j.drugalcdep.2020.108408> PMID: 33250379
299. Leke AZ, Maboh NM, Maeya SE, Armstrong O, Ndumbe LD, Nyenti BP, et al. Epidemiological Transition of Type 2 Diabetes Mellitus in Rural South West Cameroon. *Open Journal of Endocrine and Metabolic Diseases*. 2020; 10(4):45–58.
300. Fisher M. A revealing map of the world's most and least ethnically diverse countries 2013. Available from: <https://www.washingtonpost.com/news/worldviews/wp/2013/05/16/a-revealing-map-of-the-worlds-most-and-least-ethnically-diverse-countries/>.
301. Stangl AL, Earnshaw VA, Logie CH, van Brakel W, C Simbayi L, Barré I, et al. The Health Stigma and Discrimination Framework: a global, crosscutting framework to inform research, intervention development, and policy on health-related stigmas. *BMC medicine*. 2019; 17(1):1–13.
302. Organization WH. WHO global report on traditional and complementary medicine 2019: World Health Organization; 2019.
303. Lebeso V, Aldous C, Malherbe HL. South African congenital disorders data, 2006–2014. *S Afr Med J*. 2016; 106(10):992–5. <https://doi.org/10.7196/SAMJ.2016.v106i10.11314> PMID: 27725019
304. Corrigan T. Africa's ICT Infrastructure: Its Present and Prospects. 2020.
305. Akanbi MO, Ocheke AN, Agaba PA, Daniyam CA, Agaba EI, Okeke EN, et al. Use of electronic health records in sub-Saharan Africa: progress and challenges. *Journal of Medicine in the Tropics*. 2012; 14(1):1. PMID: 25243111
306. Dolk H, Leke AZ, Whitfield P, Moore R, Karnell K, Barišić I, et al. Global birth defects app: An innovative tool for describing and coding congenital anomalies at birth in low resource settings. *Birth Defects Research*. 2021. <https://doi.org/10.1002/bdr2.1898> PMID: 33949803
